# Supplementary material for: Catalytic Asymmetric Fluorination of Alkyl 1-indanone-2-carboxylates Ruled by Pybox-Eu(III) Combination
Source: PubMed Central journal article supplement (PMC6471818; doi:10.3390/molecules24061141), 2019-03-22

## Supporting Information

# Catalytic asymmetric fluorination of alkyl 1-indanone-2-carboxylates ruled by *pybox*-Eu(III) combination

Albert Granados,<sup>†</sup> Pau Sarró,<sup>†</sup> Adelina Vallribera<sup>†,\*</sup>

<sup>†</sup>Department of Chemistry, Centro de Innovación en Química Avanzada (ORFEO-CINQA). Universitat Autònoma de Barcelona, 08193, Cerdanyola del Vallès, Barcelona (Spain).

### Table of Contents

|                                                               |           |
|---------------------------------------------------------------|-----------|
| <b>1. General Information.....</b>                            | <b>S2</b> |
| <b>2. Starting Materials .....</b>                            | <b>S2</b> |
| <b>3. General procedure for the acylation reactions .....</b> | <b>S2</b> |
| <b>4. Data of compounds 10.....</b>                           | <b>S3</b> |
| <b>5. Synthesis of <i>pybox</i> ligands 4 and 5 .....</b>     | <b>S5</b> |
| <b>6. Spectra, HPLC and CD of compounds.....</b>              | <b>S6</b> |

## 1. General Information

GLC chromatography was performed on a capillary column (5% biphenyl and 95% dimethylpolysiloxane) of 15 m × 0.25 mm with stationary phase diameter of 0.25 μm. Column chromatography was performed on silica gel (230–400 mesh). IR spectra were determined either by transmission or by attenuated total reflectance mode (ATR). Enantiomeric excesses were determined, unless otherwise stated, by HPLC using a chiral column Chiracel Daicel-AD-H. NMR spectra were recorded operating at 250, 360, and 400 MHz. Optical rotations are reported as follows:  $[\alpha]_D^{25}$  (c in g per 100 mL, solvent).  $^{13}\text{C}$  NMR spectra were registered at 63, 91, and 101 MHz. Elemental analyses are the average of two determinations. HRMS were recorded by a Bruker micrOTOF-QII mass spectrometer (fly time analyzer) through positive electrospray ionization.

## 2. Starting materials

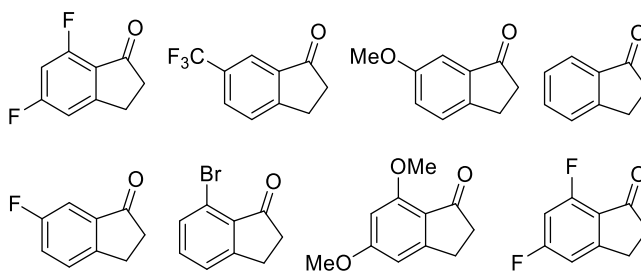

Purchased from  
commercial sources

## 3. General procedure for the acylation reactions

In a round-bottomed flask NaH 60% in grease (3 eq.) was placed. Then, it was dissolved in dry THF (0.2 mL/mmol NaH) while stirring under argon atmosphere, forming a white suspension. Next, dimethyl carbonate (3 eq.) was added (methyl 1*H*-imidazole-1-carboxylate in case **1i**) to the suspension and the corresponding ketone (1 eq.) was dissolved with dry THF (1 mL/mol ketone) in an addition funnel. The ketone solution was added to the reaction mixture dropwise in a period of 3-5 minutes. The reaction mixture was heated to reflux until total conversion of the reagent was observed by TLC (3-5 h). Afterwards, 1 M HCl was added to the mixture until pH = 2-3. The aqueous mixture was then extracted with dichloromethane. The organic fraction was dried over anhydrous Na<sub>2</sub>SO<sub>4</sub> and the solvent was removed under reduced pressure.

Finally, the product was purified by column chromatography on silica-gel when necessary.

**4. Data of compounds 10 (already described) obtained following the general procedure of enantioselective  $\alpha$ -fluorination described in the experimental part of the manuscript:**

*Methyl (R)-2-fluoro-1-oxo-2,3-dihydro-1H-indene-2-carboxylate (10a)*:<sup>12</sup> Following the general procedure, 70 mg (80% yield) of **10a** were obtained as a white oily solid from 0.42 mmol of **1a** using La(OTf)<sub>3</sub> and (*S,R*)-ind-*pybox*. It was purified by column chromatography on silica-gel (hexane/AcOEt 4:1). <sup>1</sup>H NMR (250 MHz [D]CDCl<sub>3</sub>, 298 K, TMS)  $\delta$  = 7.83 (d,  $J$  = 7.9 Hz, 1H, ArH), 7.71 (t,  $J$  = 7.9 Hz, 1H, ArH), 7.49 (m, 2H, ArH), 3.80 (m, 4H, CH<sub>2</sub>CF and OCH<sub>3</sub>), 3.44 ppm (dd,  $J$  = 23.4 Hz,  $J$  = 23.6 Hz, 1H, CH<sub>2</sub>CF); <sup>19</sup>F NMR (235 MHz [D]CDCl<sub>3</sub>, 298 K, TMS)  $\delta$  = -160.9 ppm (s, 1F); HPLC: Daicel Chiralpack AD-H, Hexane/*i*PrOH=99.5:0.5, 0.8 mL/min, 254 nm,  $t_r$ (minor) = 38.7 min,  $t_r$ (major) = 40.7 min (62% *ee*);  $[\alpha]_{20}^D$ : -8.6 (c=5.9, CHCl<sub>3</sub>).

*Tert-butyl (R)-2-fluoro-1-oxo-2,3-dihydro-1H-indene-2-carboxylate (10c)*:<sup>12</sup> Following the general procedure, using Eu(OTf)<sub>3</sub> and (*S,R*)-ind-*pybox*, 67 mg (78% yield) of **10c** were obtained as a colorless oil from 0.34 mmol of **2c**. It was purified by column chromatography on silica-gel (hexane/AcOEt 9:1). <sup>1</sup>H NMR (250 MHz [D]CDCl<sub>3</sub>, 298 K, TMS)  $\delta$  = 7.84 (d,  $^3J_{(H,H)}$  = 7.6 Hz, 1H, ArH), 7.70 (t,  $^3J_{(H,H)}$  = 7.6 Hz, 1H, ArH), 7.47 (m, 2H, ArH), 3.74 (dd,  $^3J_{(H,H)}$  = 10.7 Hz,  $^2J_{(H,F)}$  = 18.3 Hz, 1H, CH<sub>2</sub>CF), 3.40 (dd,  $^2J_{(H,H)}$  = 22.6 Hz,  $^3J_{(H,F)}$  = 24.9 Hz, 1H, CH<sub>2</sub>CF), 1.44 (s, 9H, OC(CH<sub>3</sub>)<sub>3</sub>); <sup>19</sup>F NMR (235 MHz [D]CDCl<sub>3</sub>, 298 K, TMS)  $\delta$  = -164.4 ppm (s, 1F); HPLC: Daicel Chiralpack AD-H, Hexane/*i*PrOH=99:1 1.0 mL/min, 254 nm,  $t_r$ (minor) = 24.6 min,  $t_r$ (major) = 33.7 min (96% *ee*);  $[\alpha]_{20}^D$ : 11.2 (c=5.7, CHCl<sub>3</sub>).

*Adamantan-1-yl (R)-2-fluoro-1-oxo-2,3-dihydro-1H-indene-2-carboxylate (10d)*:<sup>12</sup> Following the general procedure, using Eu(OTf)<sub>3</sub> and (*S,R*)-ind-*pybox*, 74 mg (85% yield) of **10d** were obtained as a yellowish oil from 0.26 mmol of **2d**. It was purified by column chromatography on silica-gel (hexane/AcOEt 4:1). <sup>1</sup>H NMR (250 MHz [D]CDCl<sub>3</sub>, 298 K, TMS)  $\delta$  = 7.82 (d,  $^3J_{(H,H)}$  = 7.8 Hz, 1H, ArH), 7.70 (t,  $^3J_{(H,H)}$  = 7.8 Hz, 1H, ArH), 7.46 (m, 2H, ArH), 3.73 (dd,  $^2J_{(H,H)}$  = 10.5 Hz,  $^3J_{(H,F)}$  = 18.1 Hz, 1H, CH<sub>2</sub>CF), 3.39 (dd,  $^2J_{(H,H)}$  = 22.7 Hz,  $^3J_{(H,F)}$  = 23.8 Hz, 1H, CH<sub>2</sub>CF), 2.08 (m, 9H,

OAda), 1.63 ppm (s, 6H, OAda);  $^{19}\text{F}$  NMR (235 MHz  $[\text{D}]\text{CDCl}_3$ , 298 K, TMS)  $\delta = -164.5$  ppm (s, 1F); HPLC: Daicel Chiralpack AD-H, Hexane/ $i$ PrOH=99:1, 1.0 mL/min, 254 nm,  $t_r(\text{minor}) = 23.5$  min,  $t_r(\text{major}) = 31.4$  min (90% *ee*);  $[\alpha]_{20}^{\text{D}}$ : 6.9 (c=5.7,  $\text{CHCl}_3$ ).

*Tert-butyl (R)-2-fluoro-6-methoxy-1-oxo-2,3-dihydro-1H-indene-2-carboxylate (10e)*:<sup>12</sup> Following the general procedure, using  $\text{Eu}(\text{OTf})_3$  and (*S,R*)-ind-pybox, 61 mg (72% yield) of **10e** were obtained as a yellowish oil from 0.33 mmol of **2c**. It was purified by column chromatography on silica-gel (hexane/AcOEt 9:1).  $^1\text{H}$  NMR (250 MHz  $[\text{D}]\text{CDCl}_3$ , 298 K, TMS)  $\delta = 7.38$  (d,  $^3J_{(\text{H,H})} = 8.0$  Hz, 1H, ArH), 7.24 (m, 2H, ArH), 3.85 (s, 3H, OCH<sub>3</sub>), 3.65 (dd,  $^2J_{(\text{H,H})} = 10.5$ ,  $^3J_{(\text{H,F})} = 17.6$  Hz, 1H, CH<sub>2</sub>CF), 3.31 (dd,  $^2J_{(\text{H,H})} = 22.7$ ,  $^3J_{(\text{H,F})} = 24.2$  Hz, 1H, CH<sub>2</sub>CF), 1.44 ppm (s, 9H, OC(CH<sub>3</sub>)<sub>3</sub>);  $^{19}\text{F}$  NMR (235 MHz  $[\text{D}]\text{CDCl}_3$ , 298 K, TMS)  $\delta = -163.9$  ppm (s, 1F); HPLC: Daicel Chiralpack AD-H, Hexane/ $i$ PrOH=99:1, 1.0 mL/min, 254 nm,  $t_r(\text{minor}) = 18.1$  min,  $t_r(\text{major}) = 20.0$  min (90% *ee*);  $[\alpha]_{20}^{\text{D}}$ : 10.9 (c=5.8,  $\text{CHCl}_3$ ).

*Tert-butyl (R)-2,6-difluoro-1-oxo-2,3-dihydro-1H-indene-2-carboxylate (10f)*:<sup>12</sup> Following the general procedure, using  $\text{Eu}(\text{OTf})_3$  and (*S,R*)-ind-pybox, 61 mg (71% yield) of **10f** were obtained as a yellowish oil from 0.32 mmol of the starting material. It was purified by column chromatography on silica-gel (hexane/AcOEt 9:1).  $^1\text{H}$  NMR (250 MHz  $\text{CDCl}_3$ , 298 K) 7.45 (m, 3H, ArH), 3.71 (dd,  $^2J_{(\text{H,H})} = 10.5$ ,  $^3J_{(\text{H,F})} = 18.5$  Hz, 1H, CH<sub>2</sub>CF), 3.32 (m, 1H, CH<sub>2</sub>CF), 1.44 (s, 9H, OC(CH<sub>3</sub>)<sub>3</sub>);  $^{19}\text{F}$  NMR (235 MHz  $[\text{D}]\text{CDCl}_3$ , 298 K, TMS)  $\delta = -112.8$  (s, 1F),  $-163.8$  ppm (s, 1F); HPLC: Daicel Chiralpack AD-H, Hexane/ $i$ PrOH=99.5:0.5 1.0 mL/min, 254 nm,  $t_r(\text{minor}) = 25.0$  min,  $t_r(\text{major}) = 28.6$  min (93% *ee*);  $[\alpha]_{20}^{\text{D}}$ : 8.3 (c=6.0,  $\text{CHCl}_3$ ).

*Tert-butyl (R)-2-fluoro-5,6-dimethoxy-1-oxo-2,3-dihydro-1H-indene-2-carboxylate (10h)*:<sup>12</sup> Following the general procedure, using  $\text{Eu}(\text{OTf})_3$  and (*S,R*)-ind-pybox, 57 mg (66% yield) of **10h** were obtained as a yellowish oil from 0.33 mmol of **2h**. It was purified by column chromatography on silica-gel (hexane/AcOEt 9:1).  $^1\text{H}$  NMR (360 MHz  $[\text{D}]\text{CDCl}_3$ , 298 K, TMS)  $\delta = 7.22$  (s, 1H, ArH), 6.90 (s, 2H, ArH), 4.01 (s, 3H, OCH<sub>3</sub>), 3.94 (s, 3H, OCH<sub>3</sub>), 3.64 (dd,  $^2J_{(\text{H,H})} = 10.5$  Hz,  $^3J_{(\text{H,F})} = 17.6$  Hz, 1H), 3.30 (dd,  $^2J_{(\text{H,H})} = 22.7$ ,  $^3J_{(\text{H,F})} = 24.2$  Hz, 1H), 1.44 ppm (s, 9H, OC(CH<sub>3</sub>)<sub>3</sub>);  $^{19}\text{F}$  NMR (235 MHz  $[\text{D}]\text{CDCl}_3$ , 298 K, TMS)  $\delta = -163.6$  ppm (s, 1F); HPLC: Daicel Chiralpack AD-H,

Hexane/*i*PrOH=85:15, 0.5 mL/min, 254 nm,  $t_r$ (major) = 17.1 min,  $t_r$ (minor) = 19.6 min (91% *ee*);  $[\alpha]_{20}^D$ : -34.4 (c=6.1, CHCl<sub>3</sub>).

## 5. Synthesis of *pybox* ligands 4 and 5

To an argon purged solution of 2,6-pyridine carbonitrile (0.8 g, 6 mmol, 1 eq) in dry methanol (25 mL) was added 0.001 g of sodium, and the solution was stirred at room temperature for 48 hours. Glacial acetic acid (0.05 mL) was subsequently added, and the solution was stirred for additional 5 minutes. Then the solution was dried in vacuo affording an off white solid. This intermediate was reintroduced in dry dichloromethane (30 mL) and the desired amino-alcohol (13.4 mmol, 2.2 eq) was added in one portion to the solution. The mixture was refluxed under inert atmosphere for 4 hours, and then stirred for 48 h at room temperature. The mixture was concentrated in vacuo and filtered from MeOH. The solid was then collected, dissolved in dichloromethane, dried over Na<sub>2</sub>SO<sub>4</sub> and concentrated under vacuum, affording the final *pybox* ligand.

2,6-Bis[(4*S*,5*R*)-4,5-diphenyl-4,5-dihydro-1,3-oxazol-2-yl]pyridine (**4**):<sup>16</sup> <sup>1</sup>H NMR (250 MHz [D]CDCl<sub>3</sub>, 298 K, TMS)  $\delta$  = 8.39 (d, <sup>3</sup> $J_{(H,H)}$  = 8.5 Hz, 2H, ArH), 8.04 (t,  $J$  = 8.5 Hz, 1H, ArH), 7.03-7.09 (m, 20H, Ph), 6.14 (d,  $J$  = 10.5 Hz, 2H, CHO), 5.84 (d,  $J$  = 10.5 Hz, 2H, CHN). <sup>13</sup>C NMR (63 MHz [D]CDCl<sub>3</sub>, 298 K, TMS)  $\delta$  = 164.2, 138.1, 137.9, 136.5, 128.4, 128.1, 127.9, 127.5, 127.2, 127.0, 126.9, 86.7, 74.9.

2,6-bis[(4*R*,5*R*)-4,5-diphenyl-4,5-dihydro-1,3-oxazol-2-yl]pyridine (**5**):<sup>14b</sup> <sup>1</sup>H NMR (360 MHz [D]CDCl<sub>3</sub>, 298 K, TMS)  $\delta$  = 8.39 (d,  $J$  = 9.5 Hz, 2H, ArH), 7.98 (t,  $J$  = 9.5 Hz, 1H, ArH), 7.30-7.37 (m, 20H, Ph), 5.54 (d,  $J$  = 8.5 Hz, 2H, CHO), 5.33 (d,  $J$  = 8.5 Hz, 2H, CHN). <sup>13</sup>C NMR (91 MHz [D]CDCl<sub>3</sub>, 298 K, TMS)  $\delta$  = 163.8, 142.1, 140.6, 138.2, 129.6, 129.4, 128.7, 127.7, 127.4, 127.0, 90.9, 79.9.

## 6. Spectra, HPLC and CD of compounds

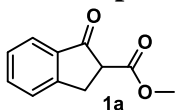

$^1\text{H}$  NMR (400 MHz,  $\text{CDCl}_3$ )

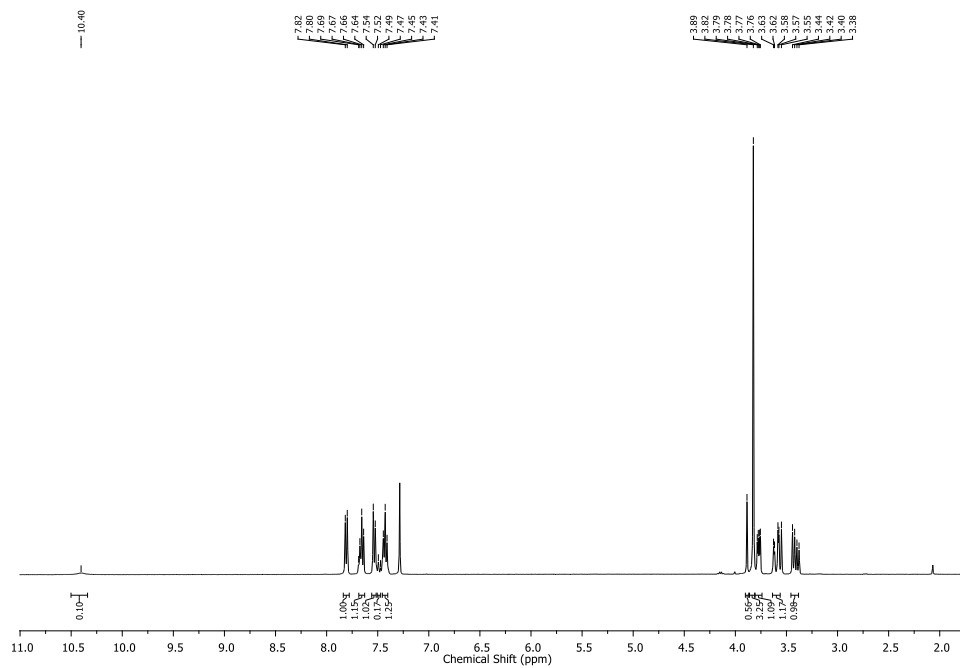

$^{13}\text{C}$ [ $^1\text{H}$ ] NMR (91 MHz,  $\text{CDCl}_3$ )

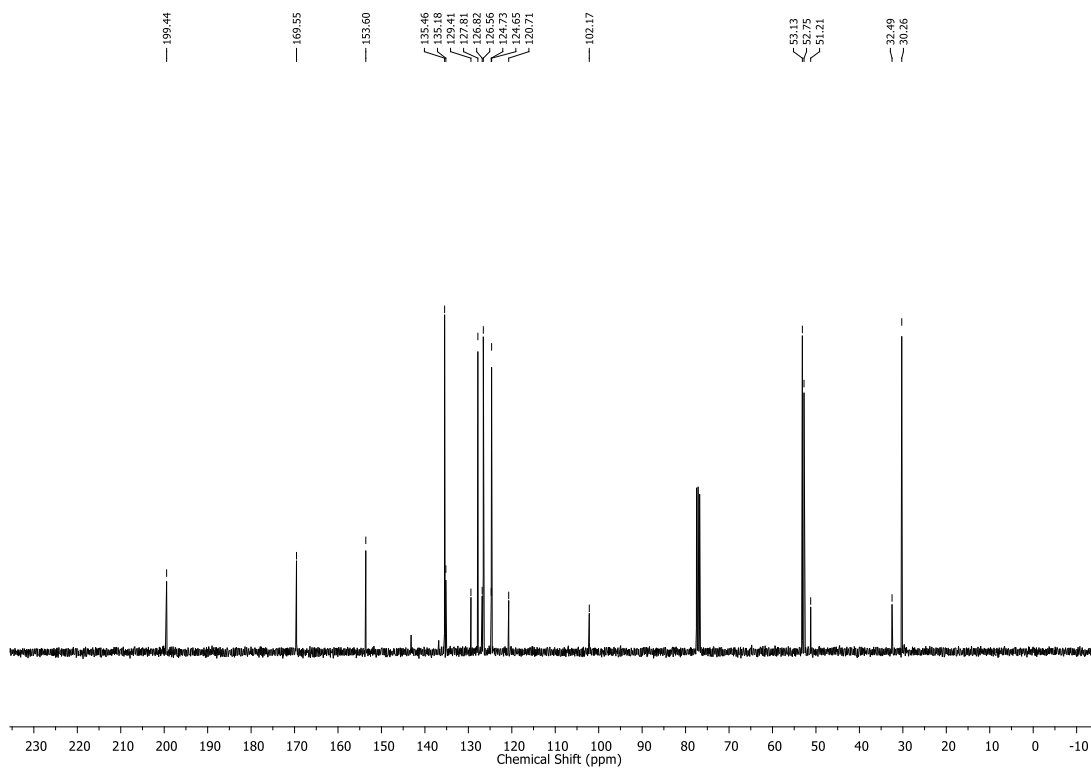

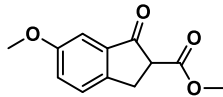

1e

$^1\text{H}$  NMR (250 MHz,  $\text{CDCl}_3$ )

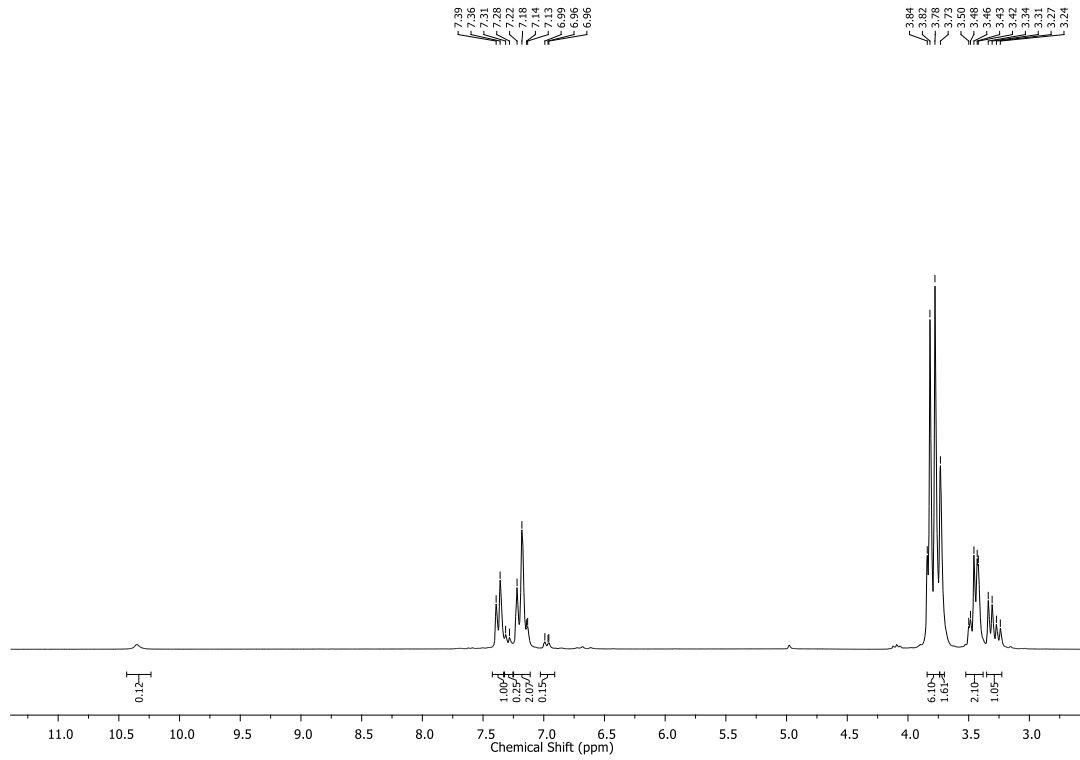

$^{13}\text{C}$ [ $^1\text{H}$ ] NMR (63 MHz,  $\text{CDCl}_3$ )

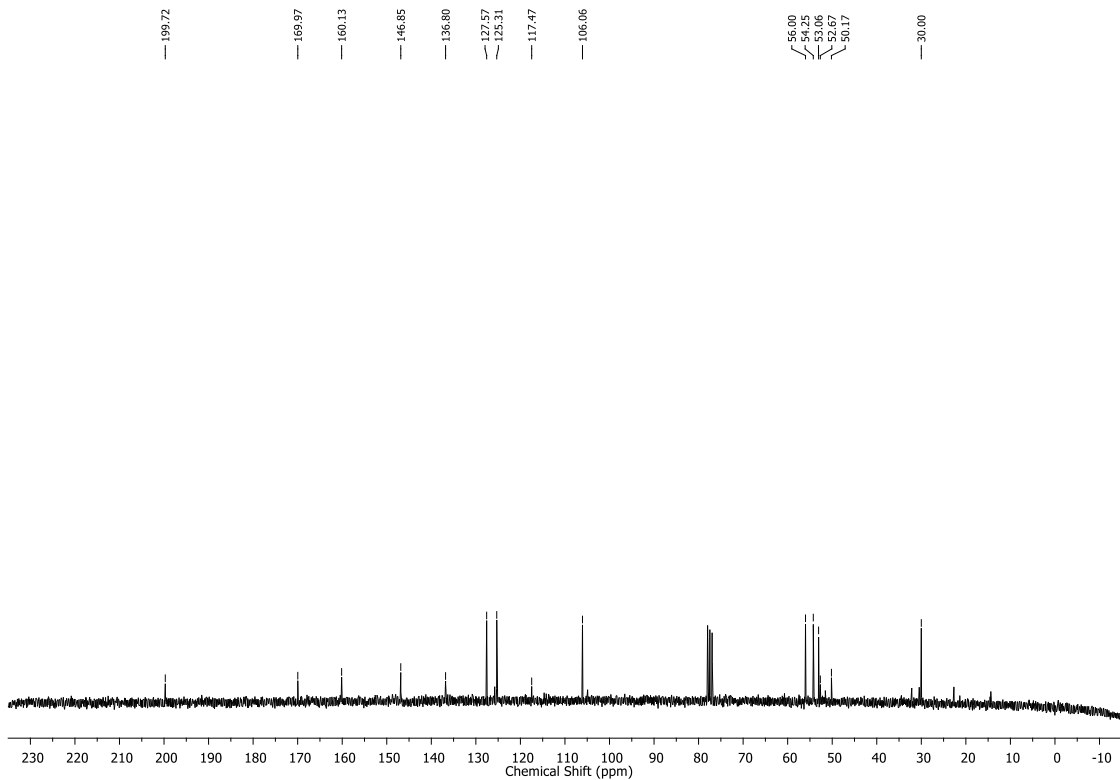

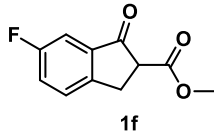

**$^1\text{H}$  NMR (250 MHz,  $\text{CDCl}_3$ )**

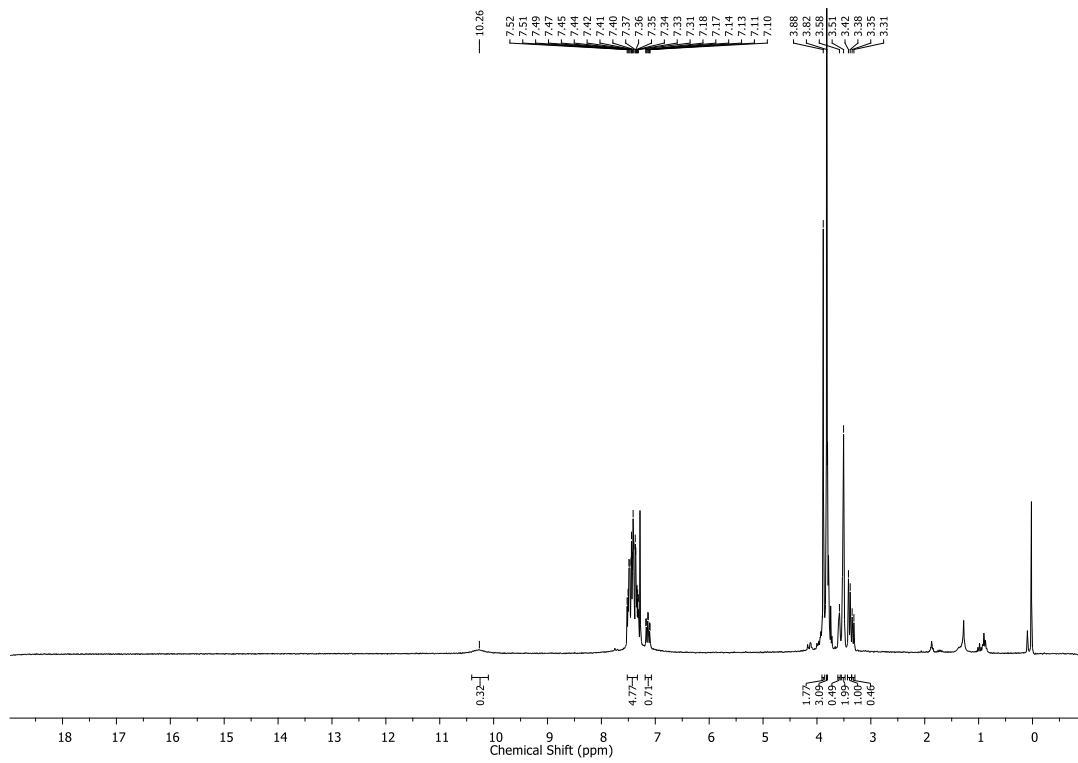

**$^{13}\text{C}$ [ $^1\text{H}$ ] NMR (91 MHz,  $\text{CDCl}_3$ )**

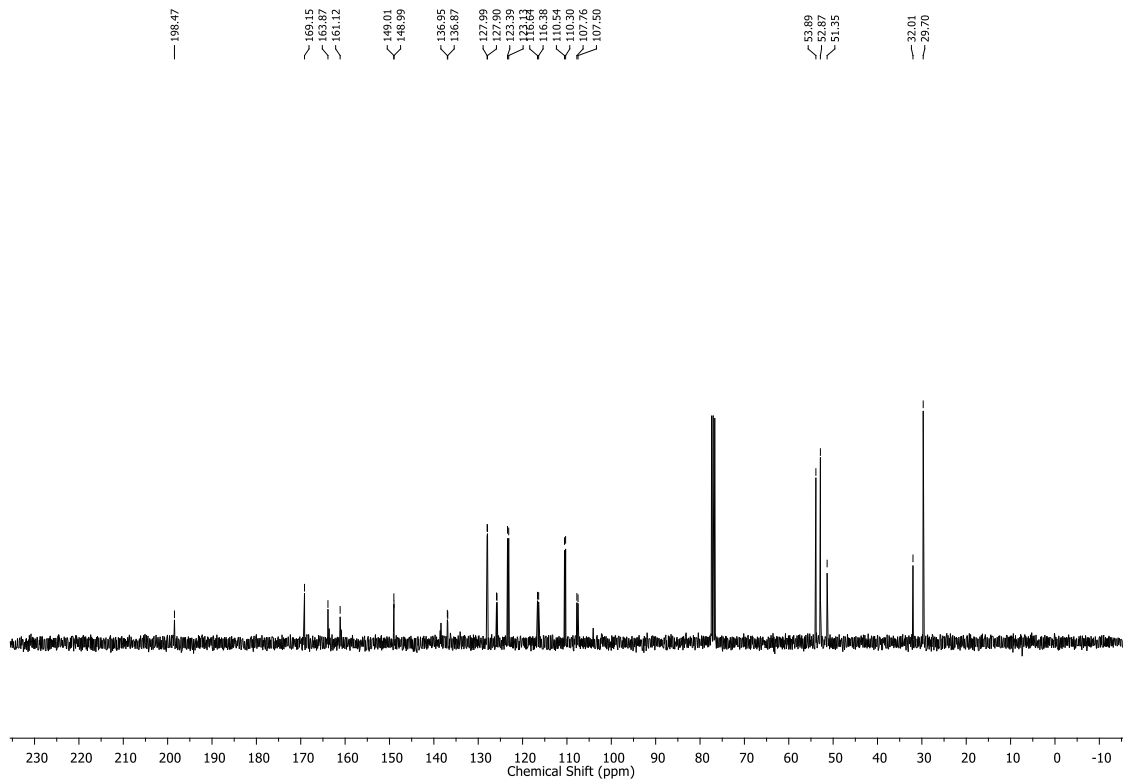



# $^{19}\text{F}$ NMR (236 MHz, $\text{CDCl}_3$ )

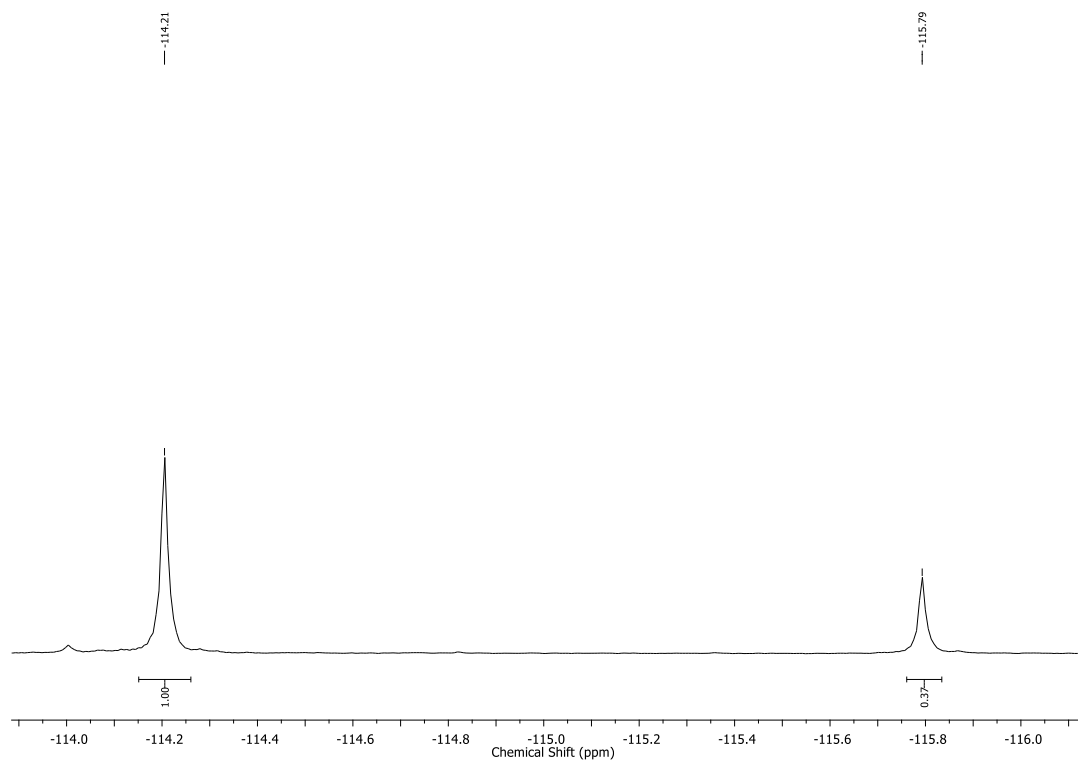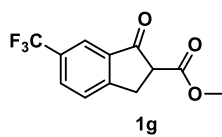

# $^1\text{H}$ NMR (400 MHz, $\text{CDCl}_3$ )

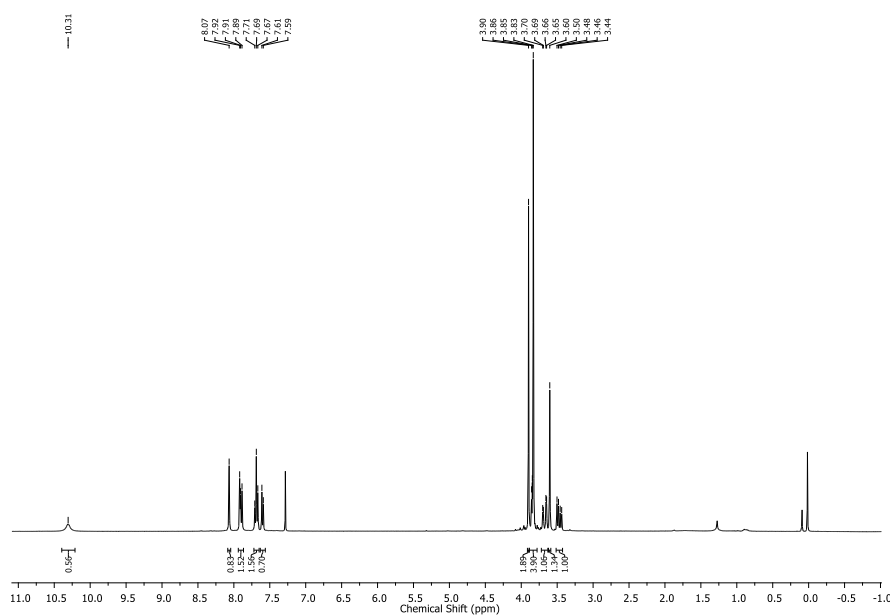

### $^{19}\text{F}$ NMR (236 MHz, $\text{CDCl}_3$ )

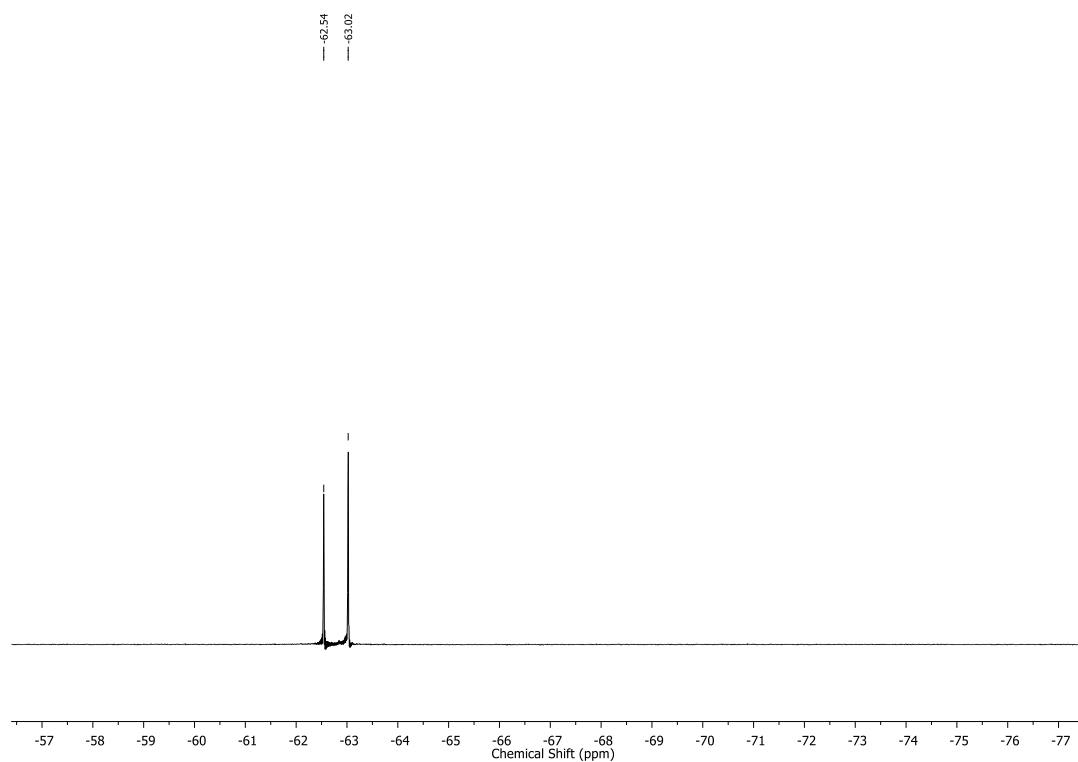

### $^{13}\text{C}[^1\text{H}]$ NMR (101 MHz, $\text{CDCl}_3$ )

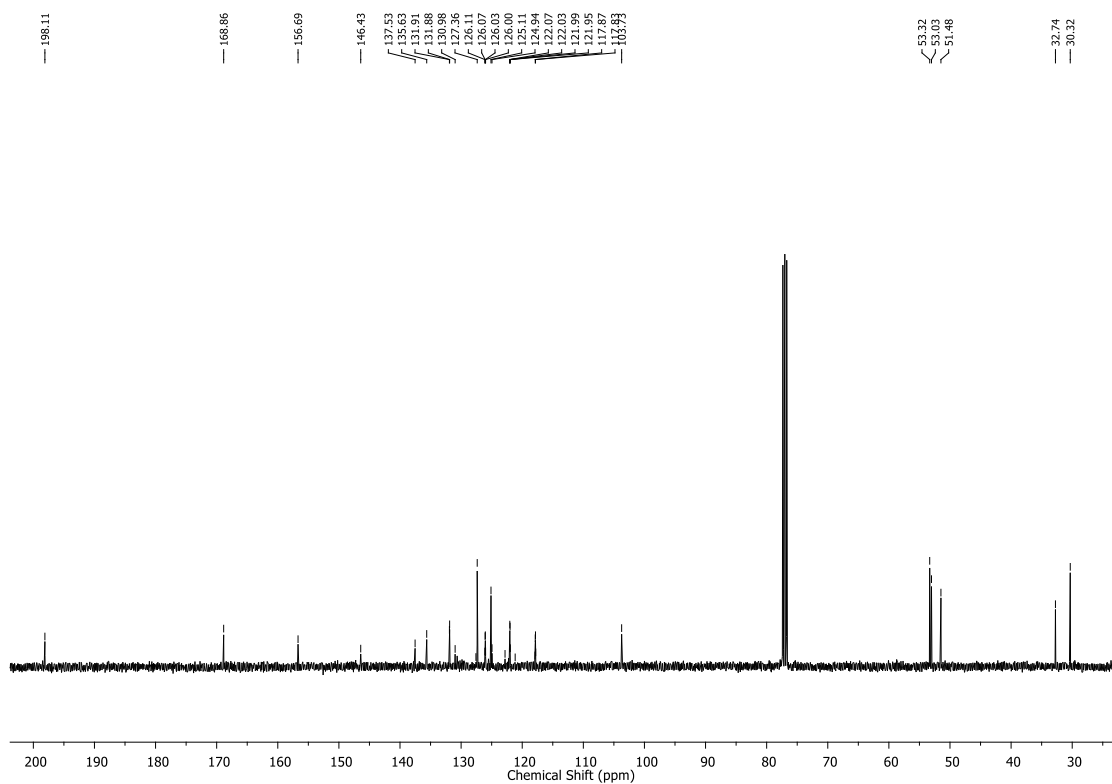

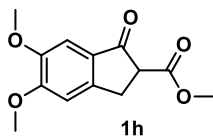

**$^1\text{H}$  NMR (360 MHz,  $\text{CDCl}_3$ )**

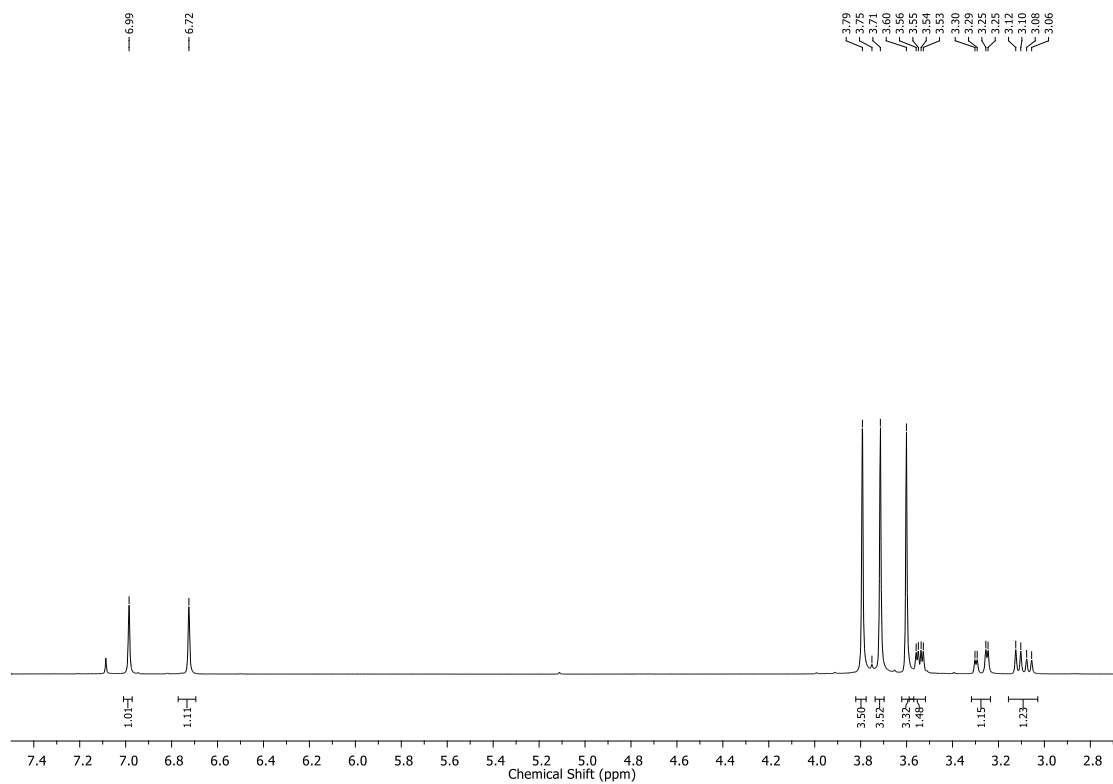

**$^{13}\text{C}[^1\text{H}]$  NMR (91 MHz,  $\text{CDCl}_3$ )**

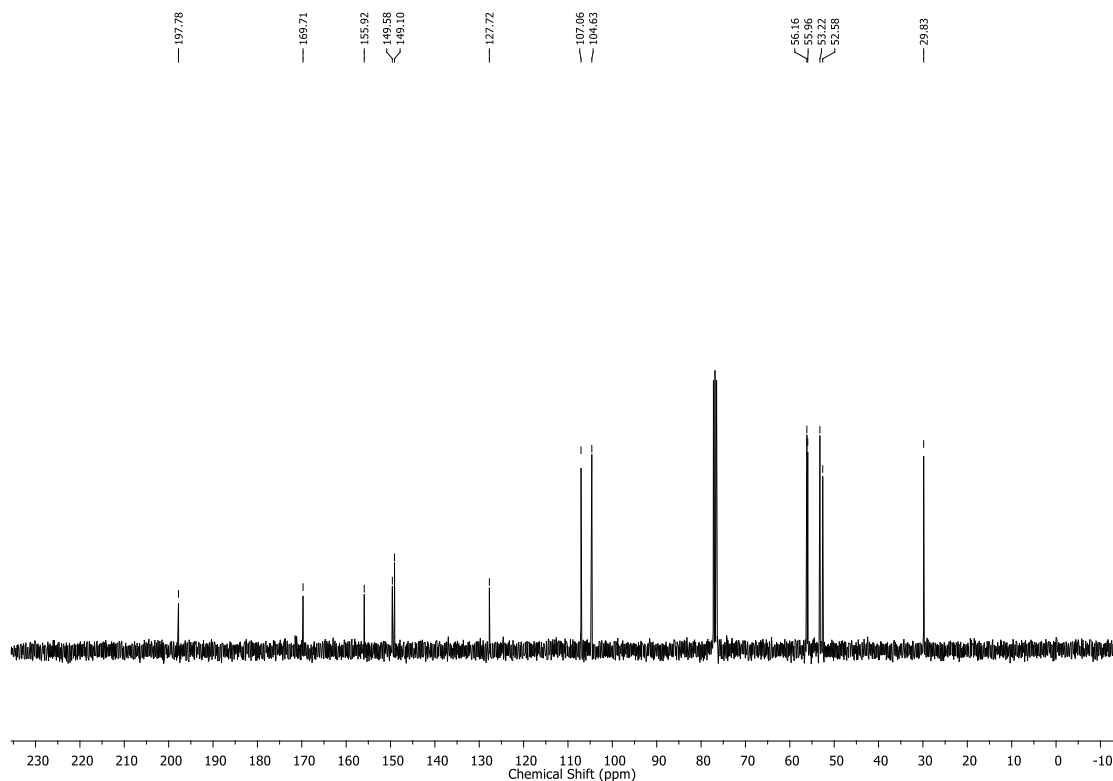

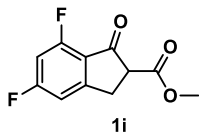

**<sup>1</sup>H NMR (360 MHz, CDCl<sub>3</sub>)**

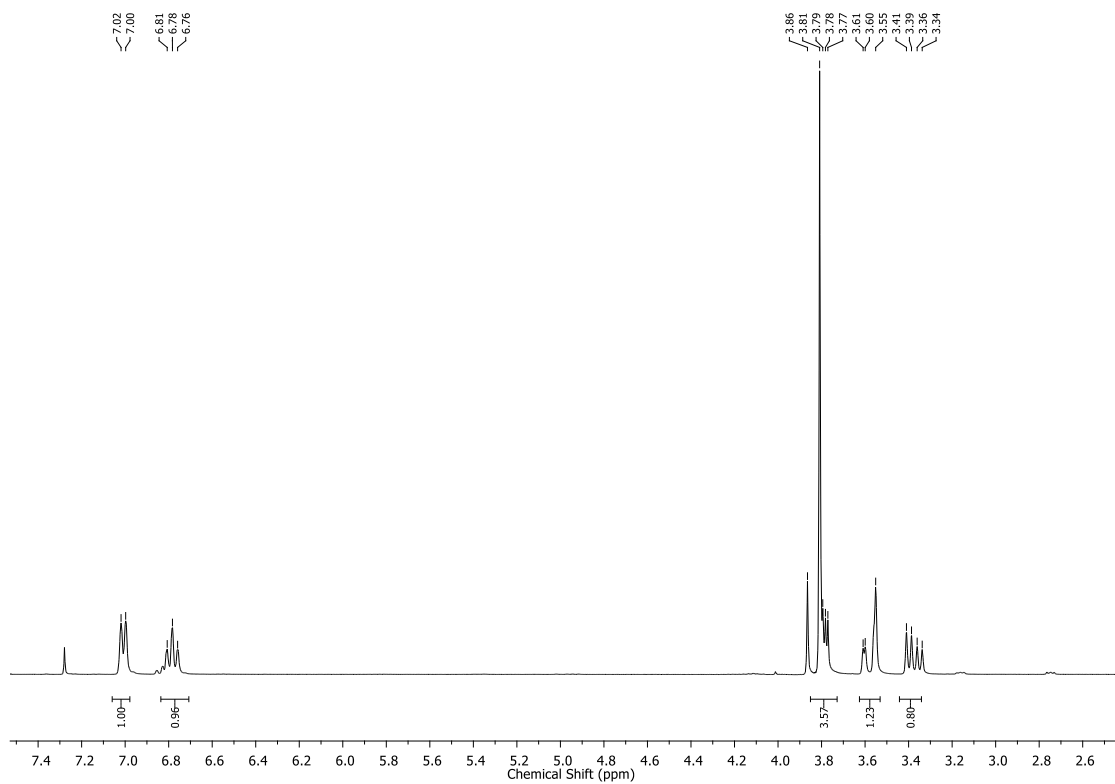

**<sup>19</sup>F NMR (236 MHz, CDCl<sub>3</sub>)**

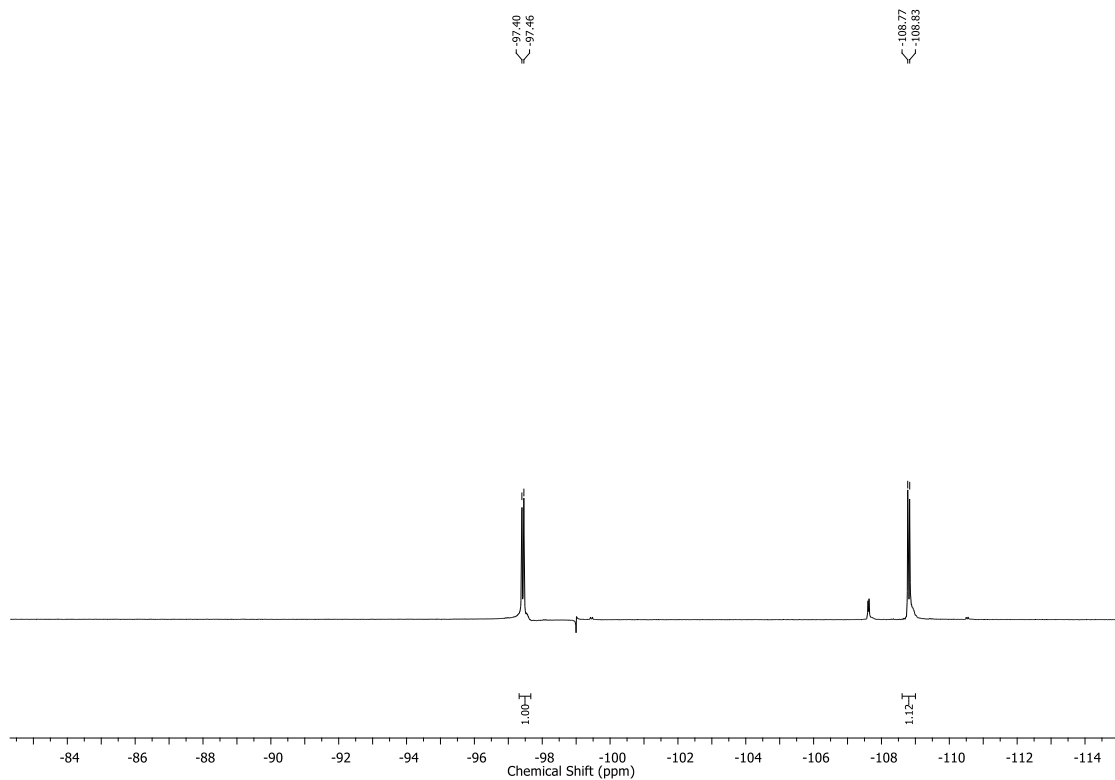



# $^{13}\text{C}[^1\text{H}]$ NMR (63 MHz, $\text{CDCl}_3$ )

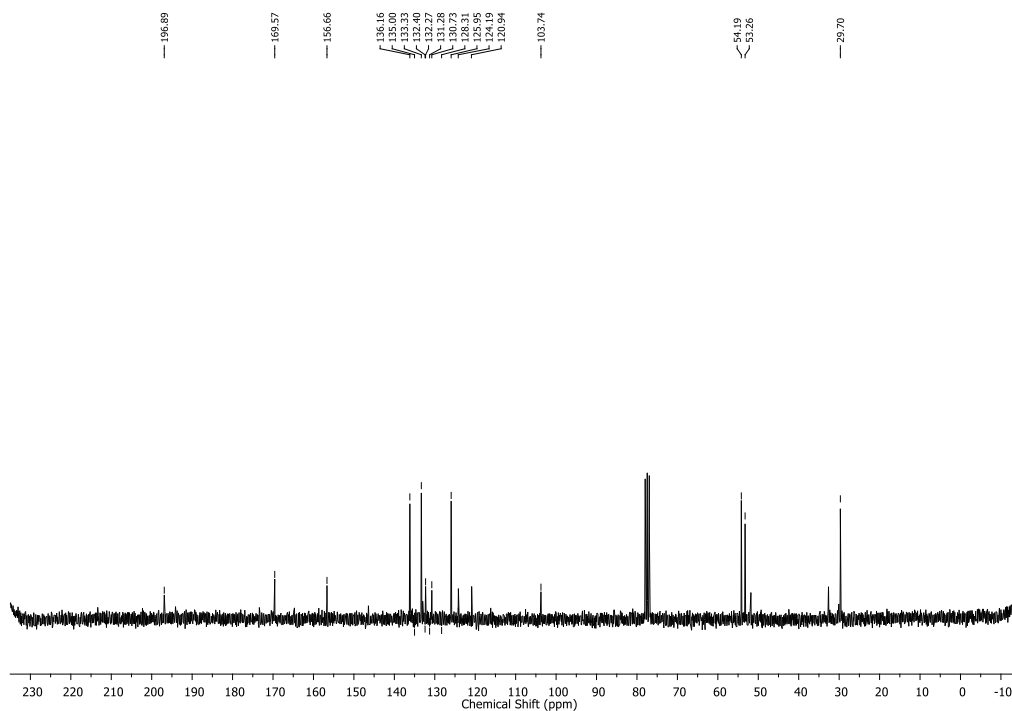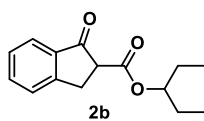

# $^1\text{H}$ NMR (400 MHz, $\text{CDCl}_3$ )

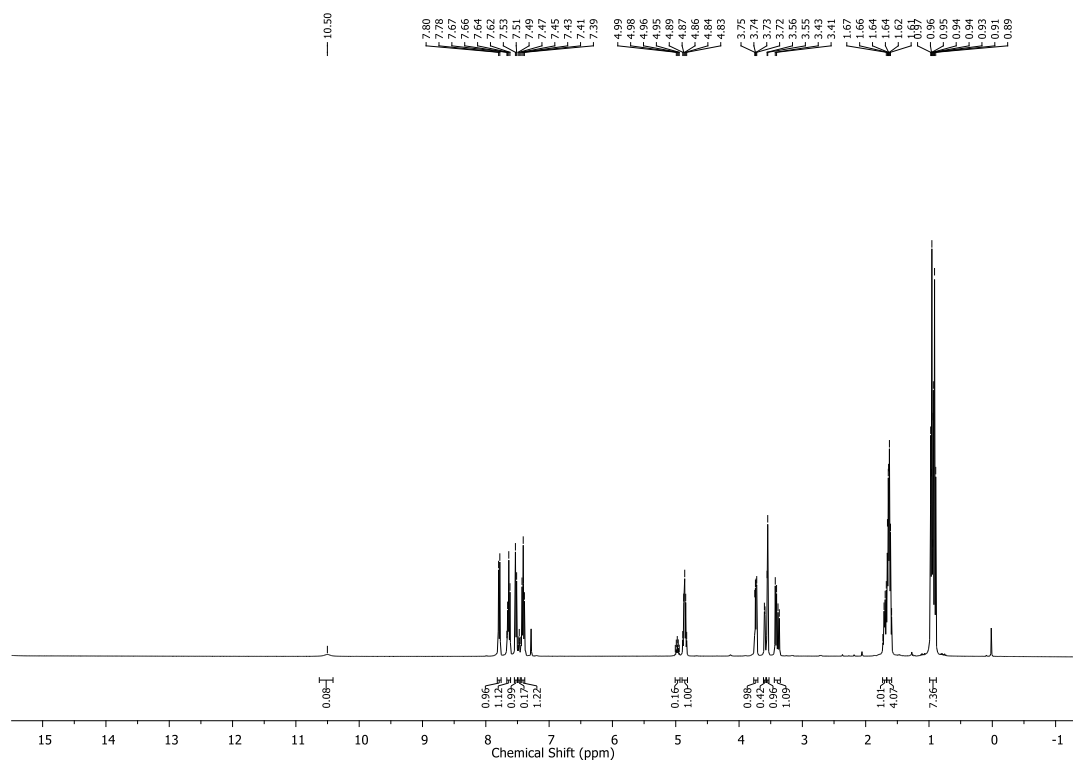

# $^{13}\text{C}$ [ $^1\text{H}$ ] NMR (101 MHz, $\text{CDCl}_3$ )

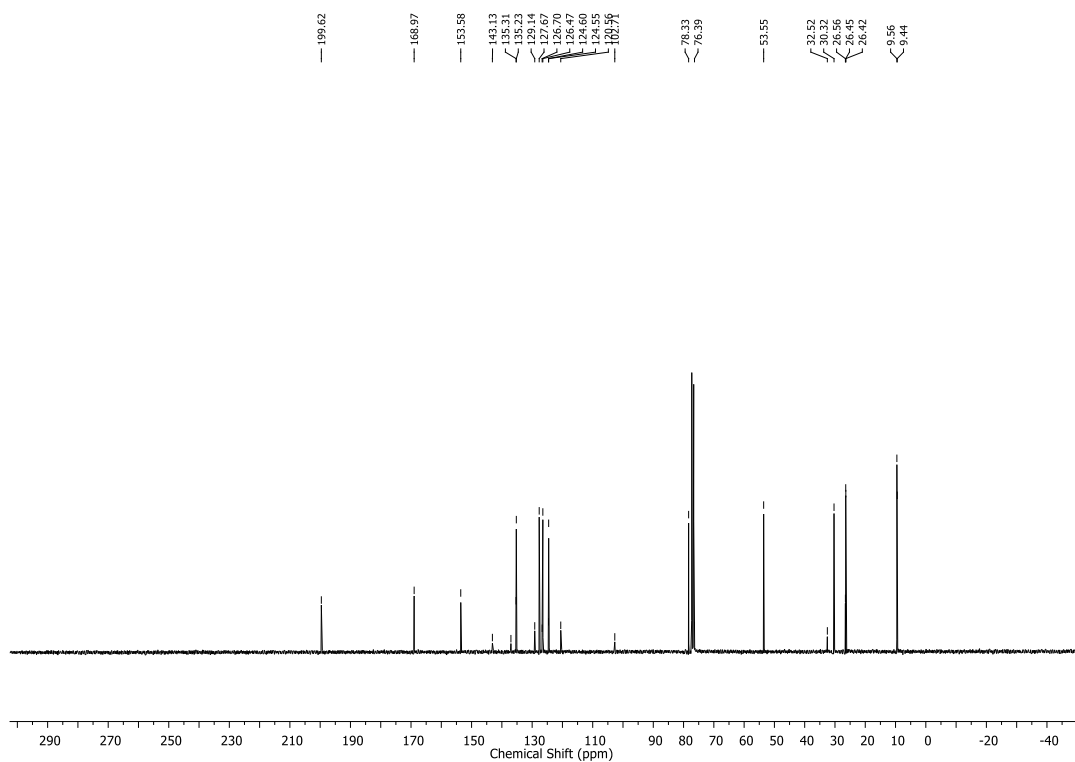

# IR (ATR)

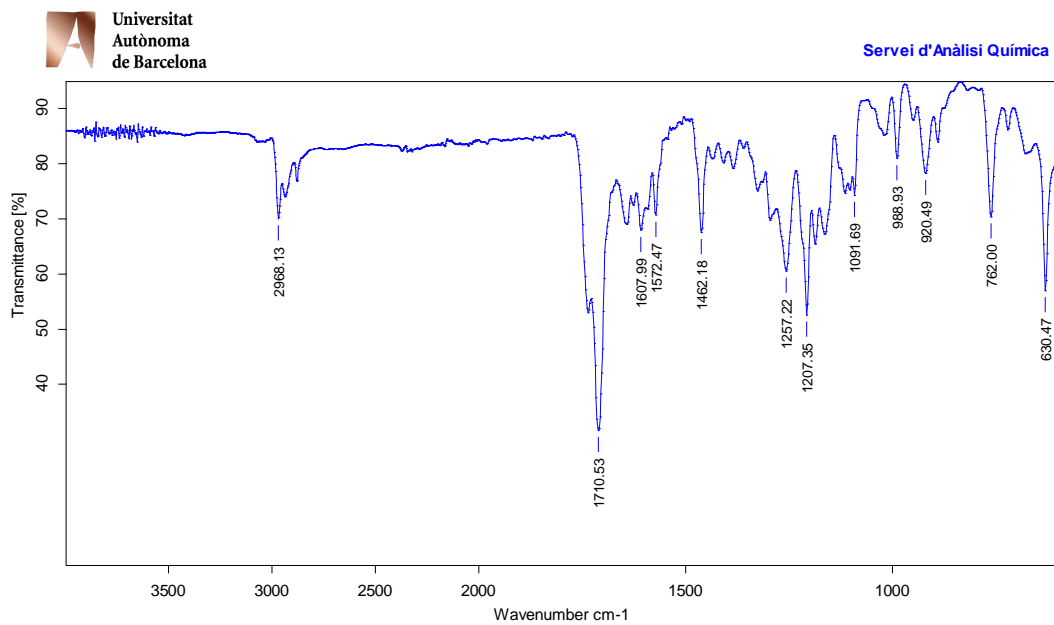

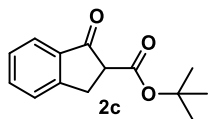

**$^1\text{H}$  NMR (360 MHz,  $\text{CDCl}_3$ )**

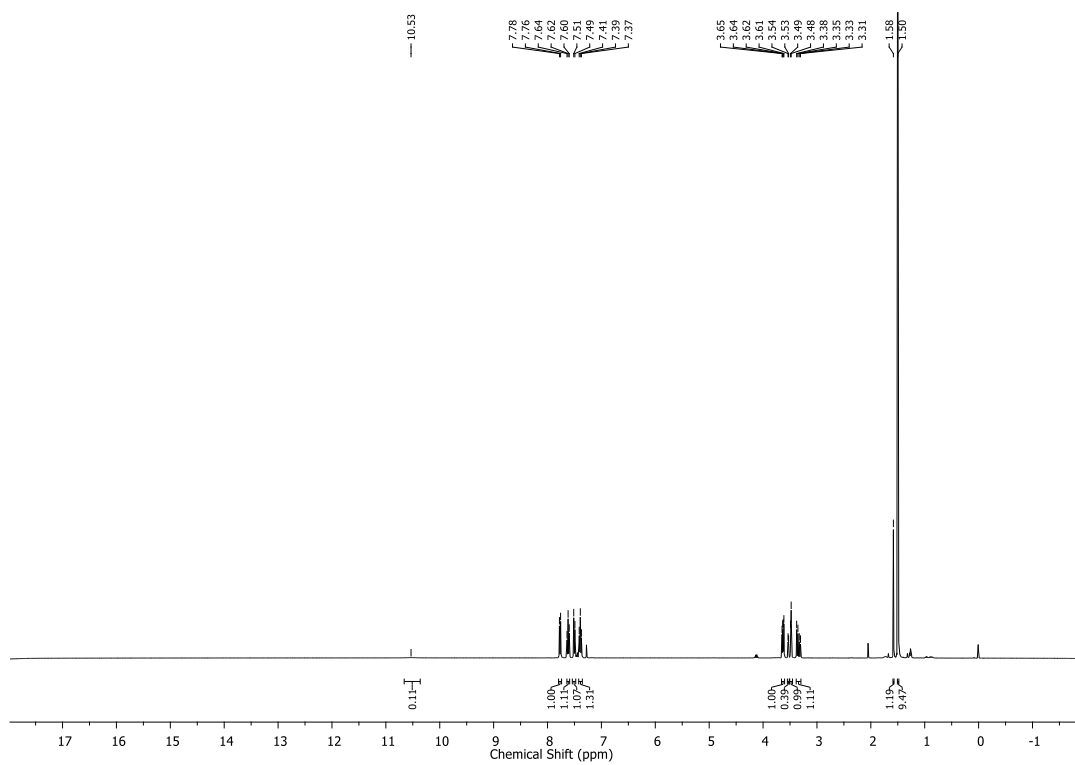

**$^{13}\text{C}$ [ $^1\text{H}$ ] NMR (101 MHz,  $\text{CDCl}_3$ )**

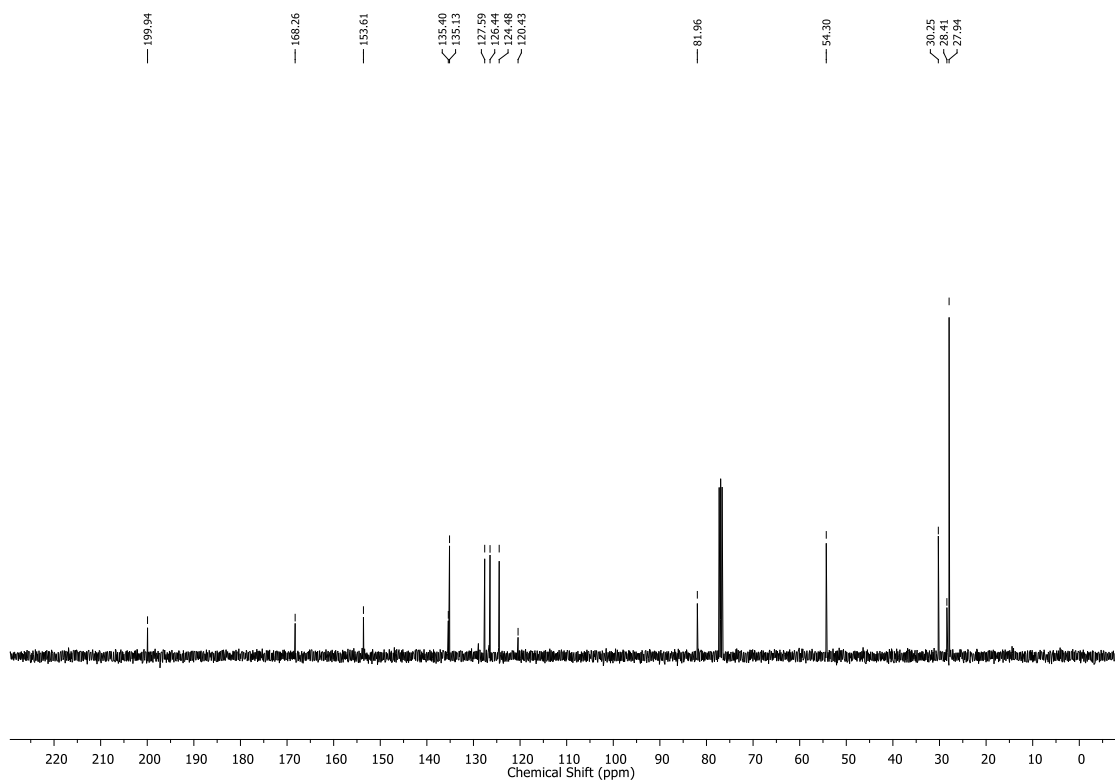



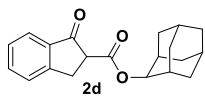

**$^1\text{H NMR}$  (360 MHz,  $\text{CDCl}_3$ )**

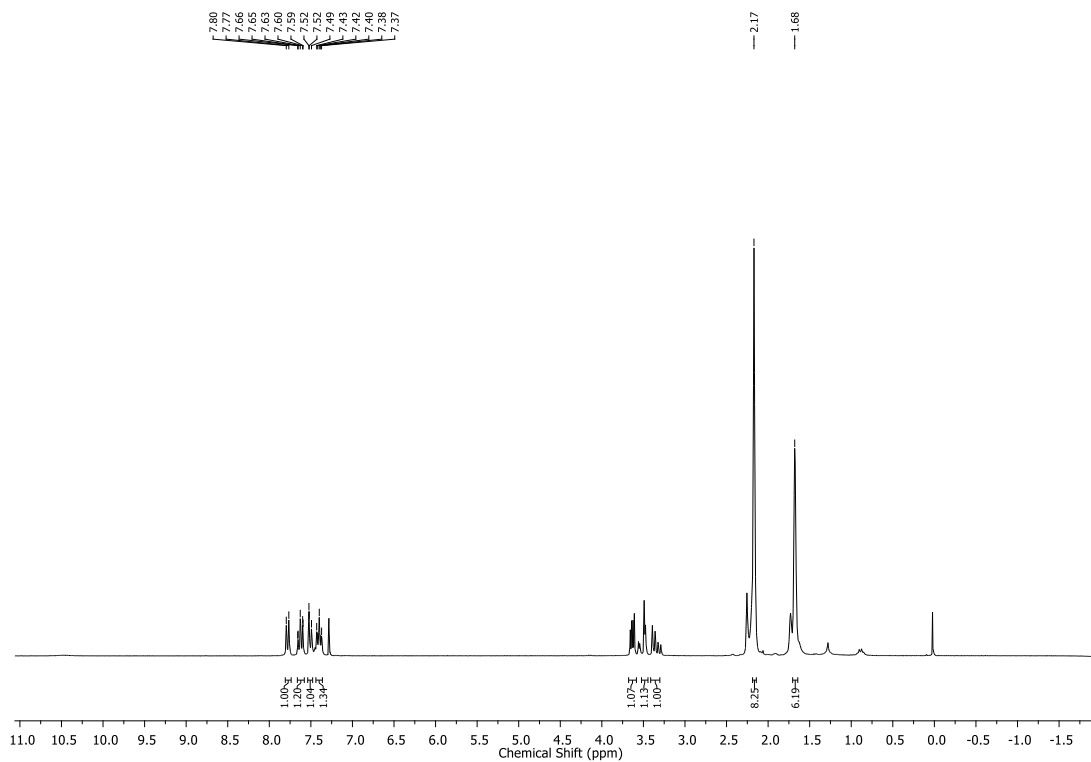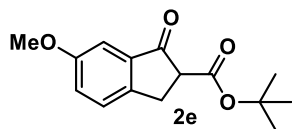

**$^1\text{H NMR}$  (250 MHz,  $\text{CDCl}_3$ )**

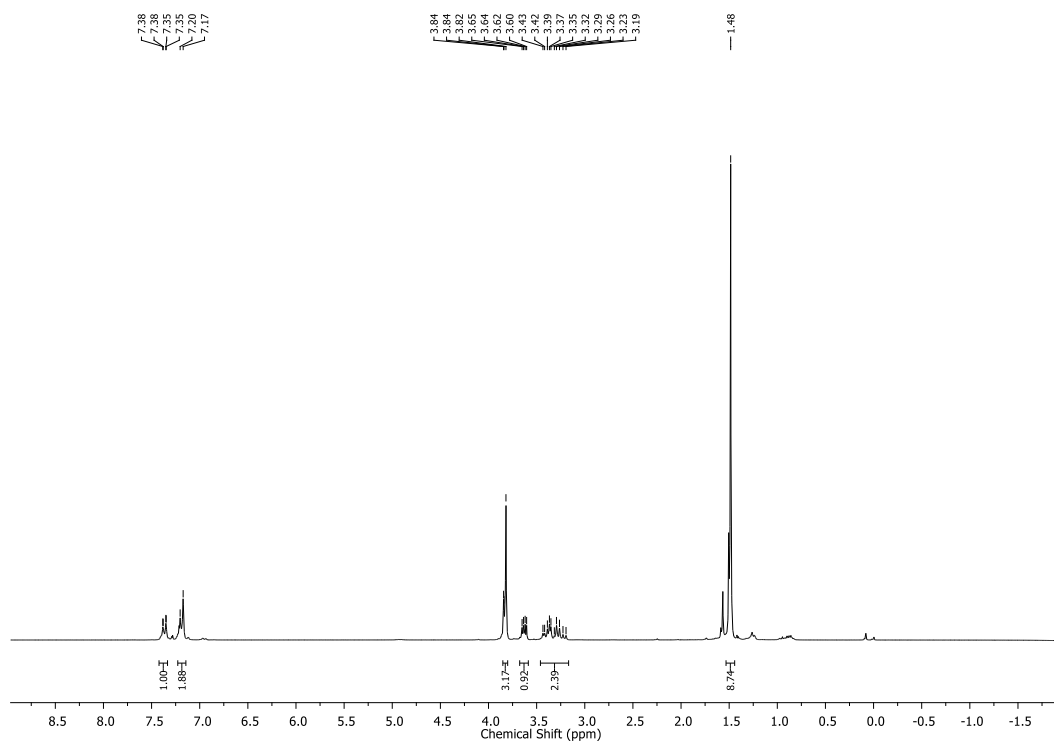

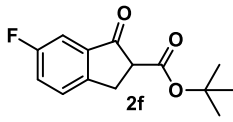

**<sup>1</sup>H NMR (250 MHz, CDCl<sub>3</sub>)**

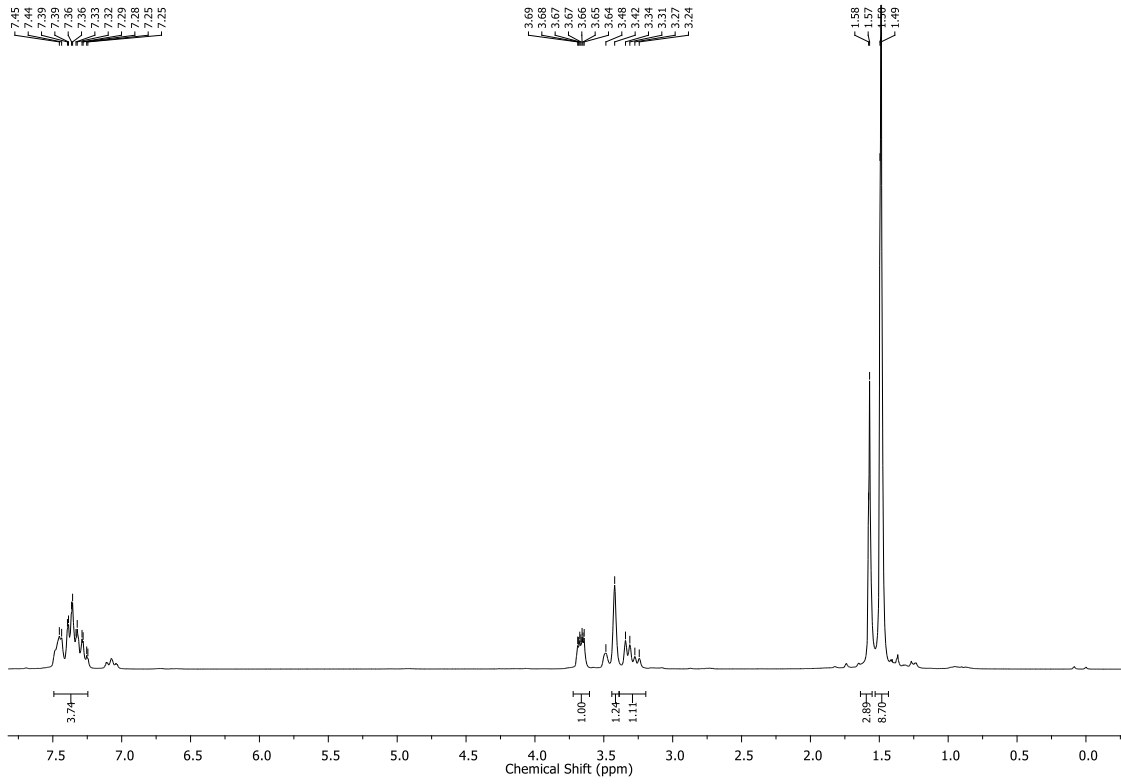

**<sup>19</sup>F NMR (235 MHz, CDCl<sub>3</sub>)**

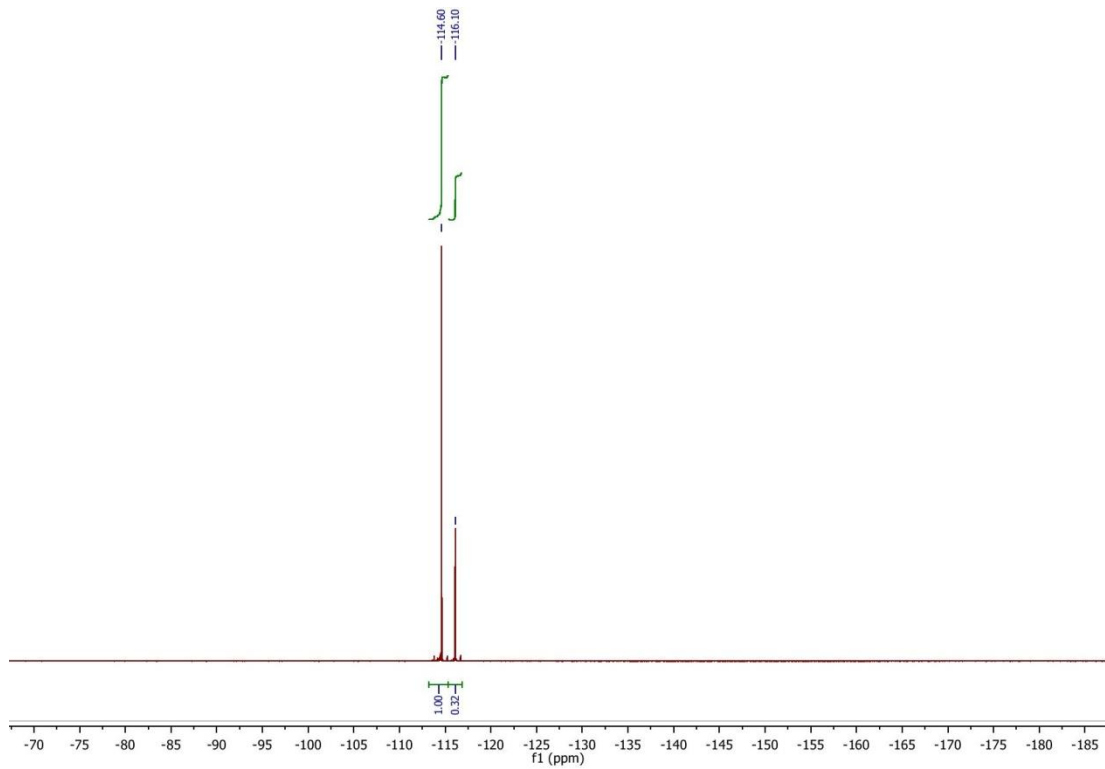

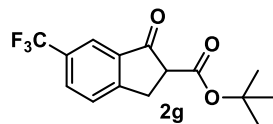

<sup>1</sup>H NMR (250 MHz, CDCl<sub>3</sub>)

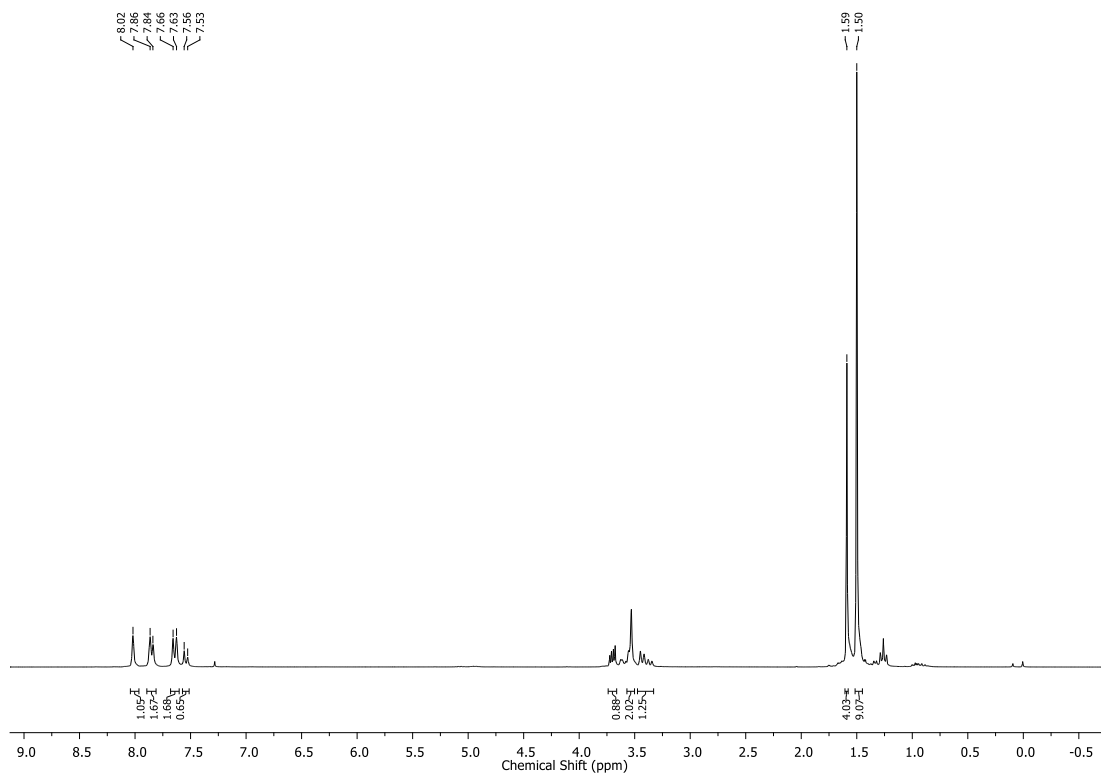

**$^{19}\text{F}$  NMR (235 MHz,  $\text{CDCl}_3$ )**

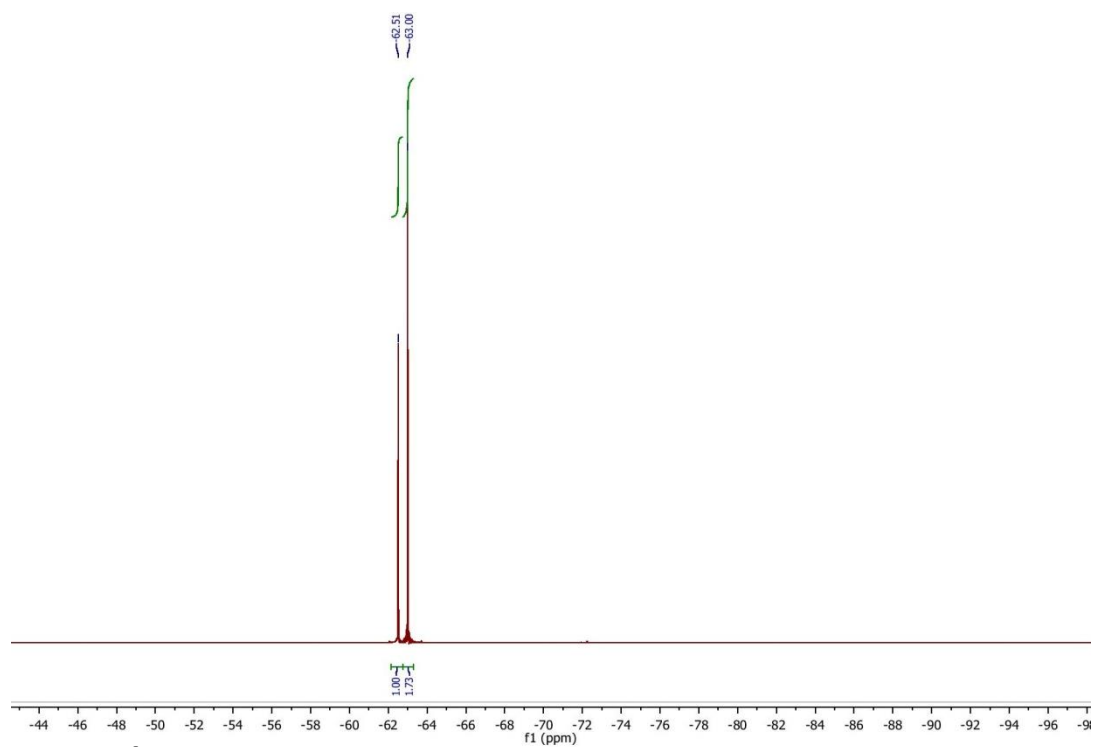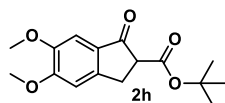

**$^1\text{H}$  NMR (250 MHz,  $\text{CDCl}_3$ )**

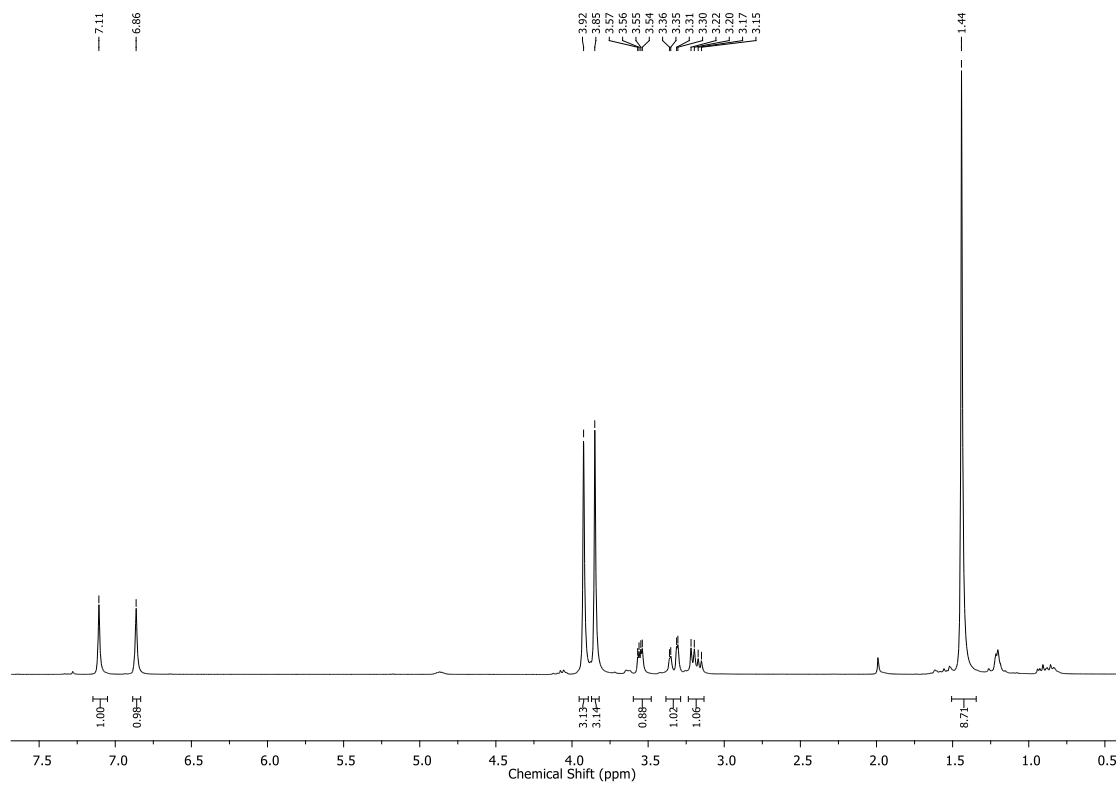

### $^{13}\text{C}$ NMR (63 MHz, $\text{CDCl}_3$ )

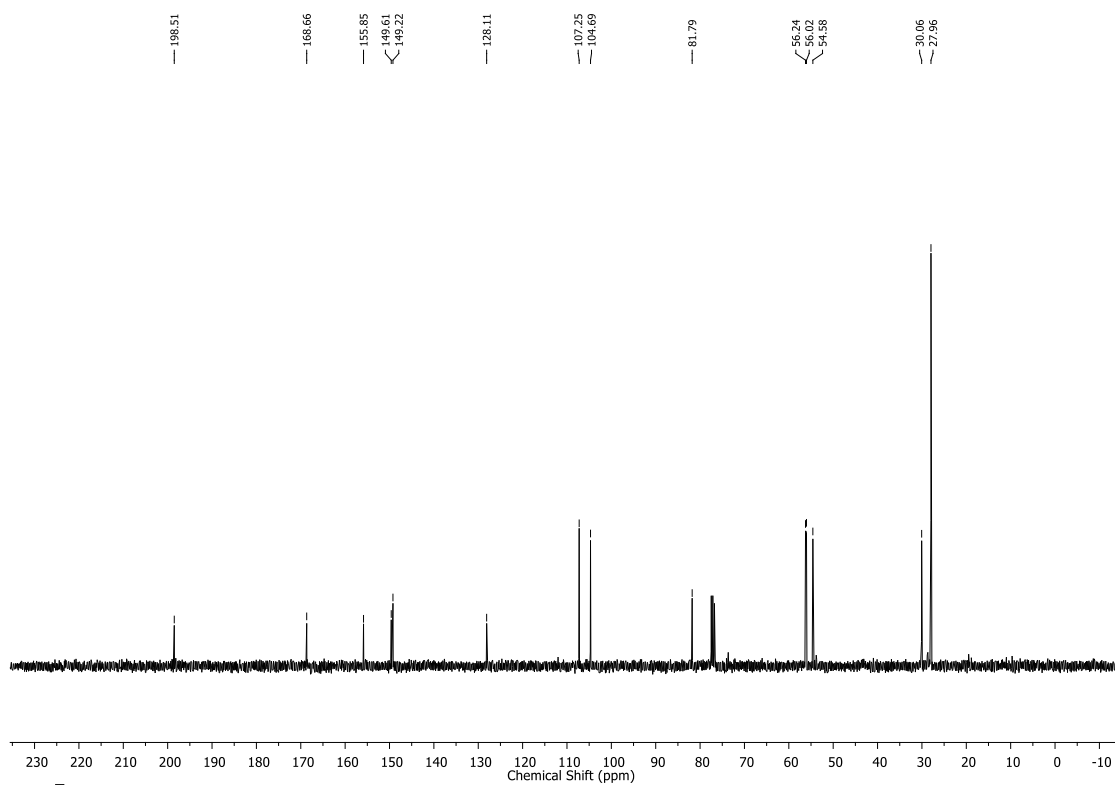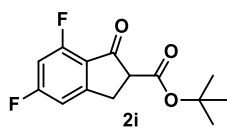

### $^1\text{H}$ NMR (360 MHz, $\text{CDCl}_3$ )

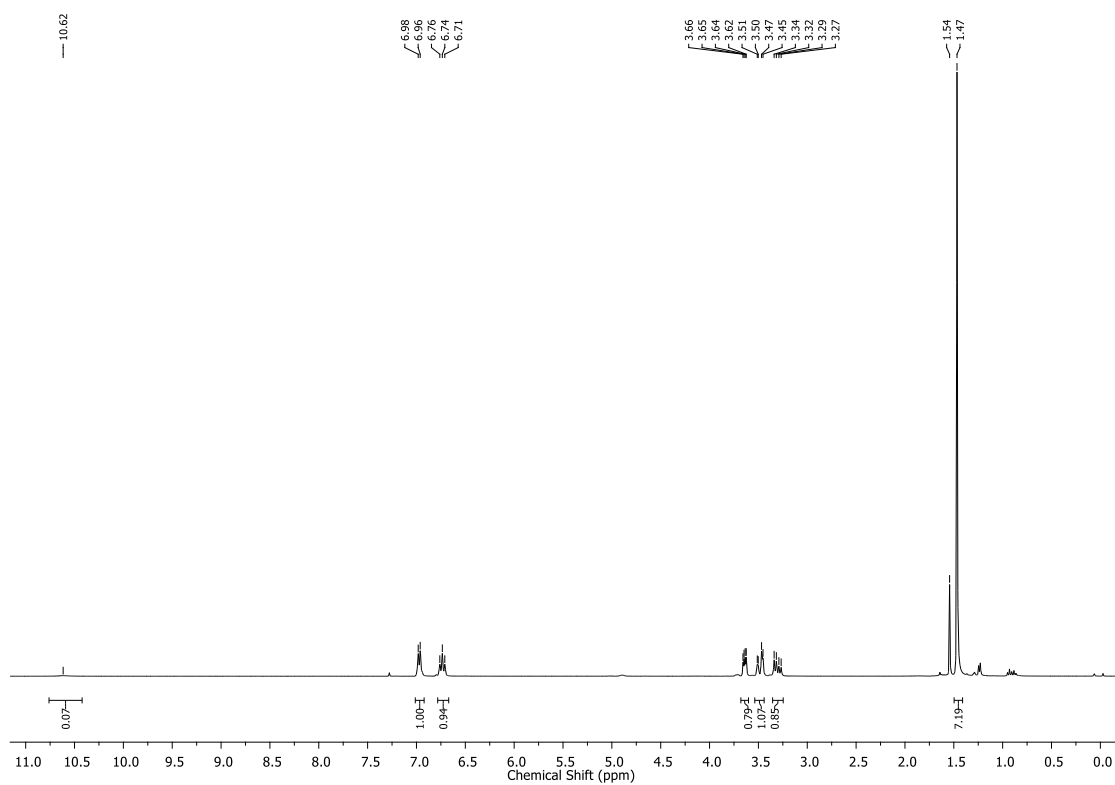

### $^{13}\text{C}$ NMR (91 MHz, $\text{CDCl}_3$ )

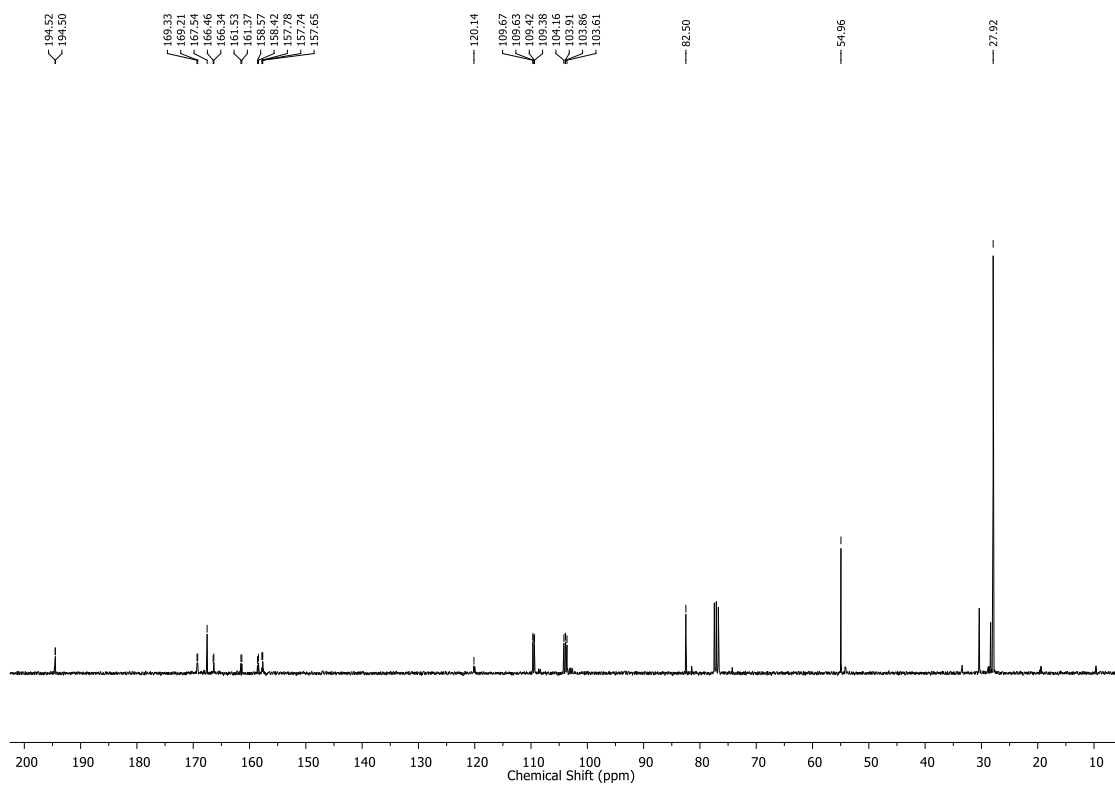

### $^{19}\text{F}$ NMR (235 MHz, $\text{CDCl}_3$ )

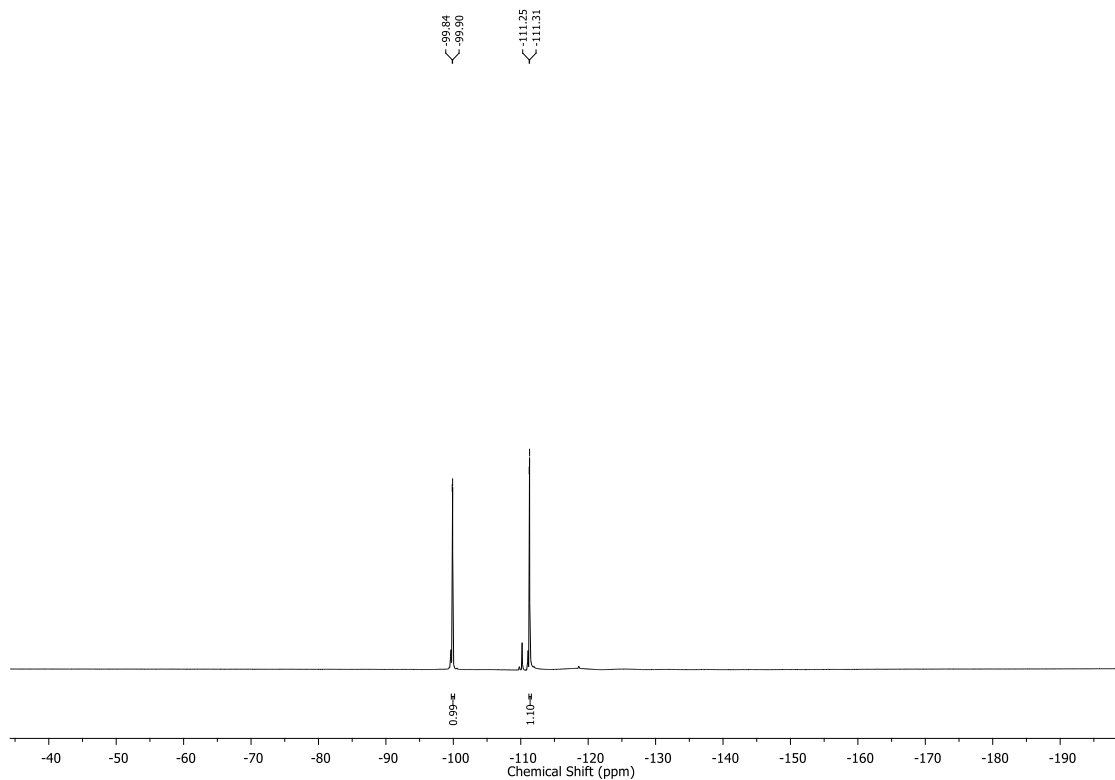

# IR (ATR)

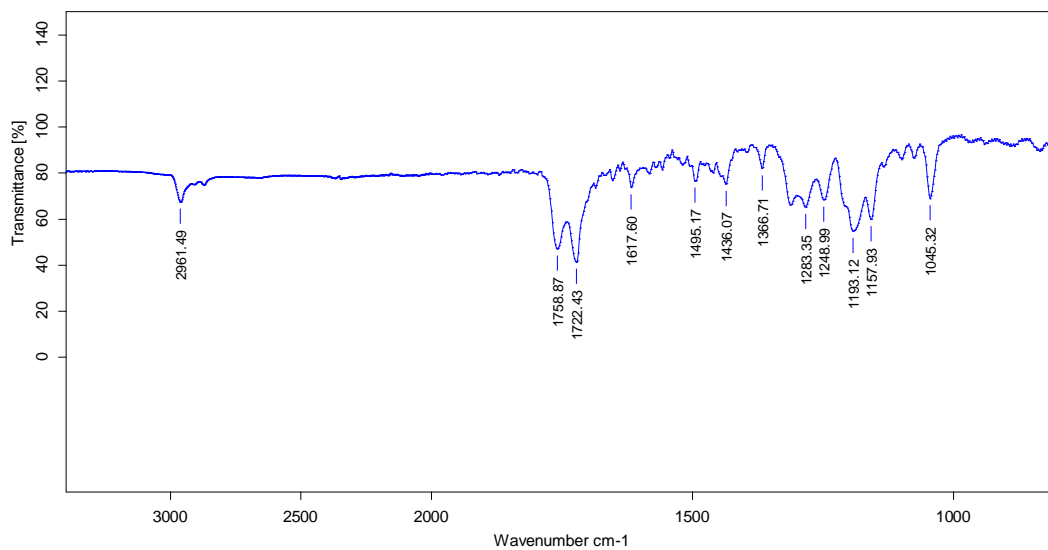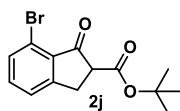

# <sup>1</sup>H NMR (250 MHz, CDCl<sub>3</sub>)

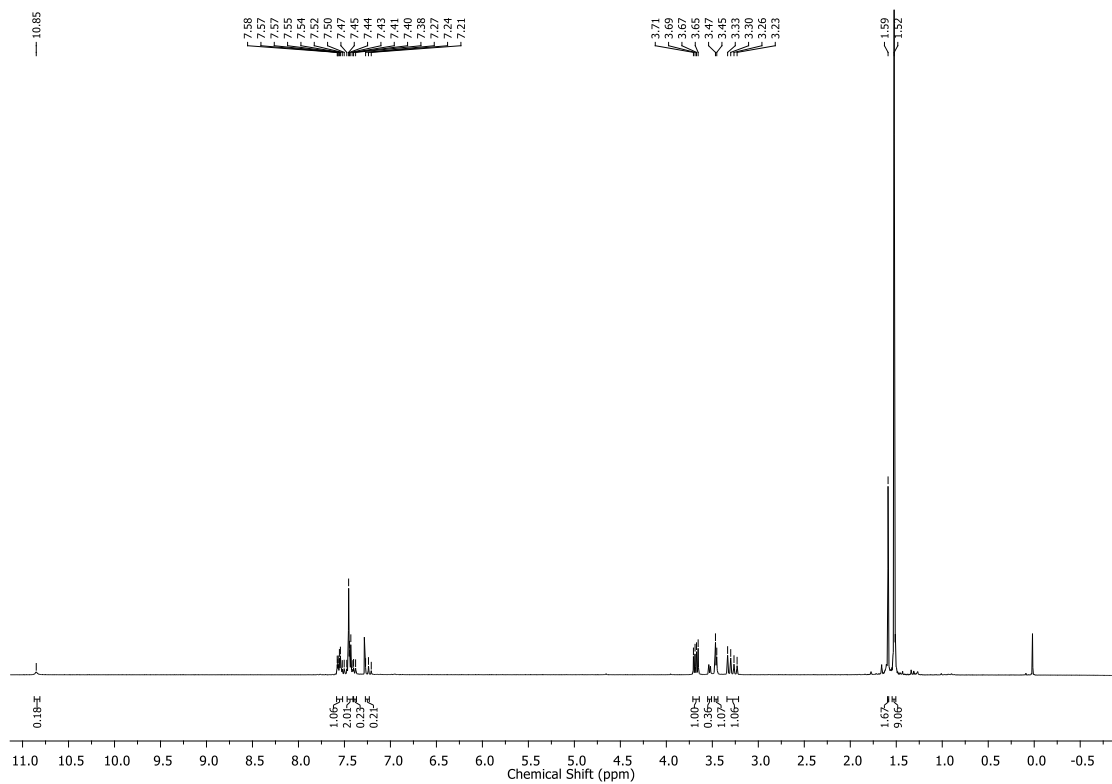

**$^{13}\text{C}$  NMR (63 MHz,  $\text{CDCl}_3$ )**

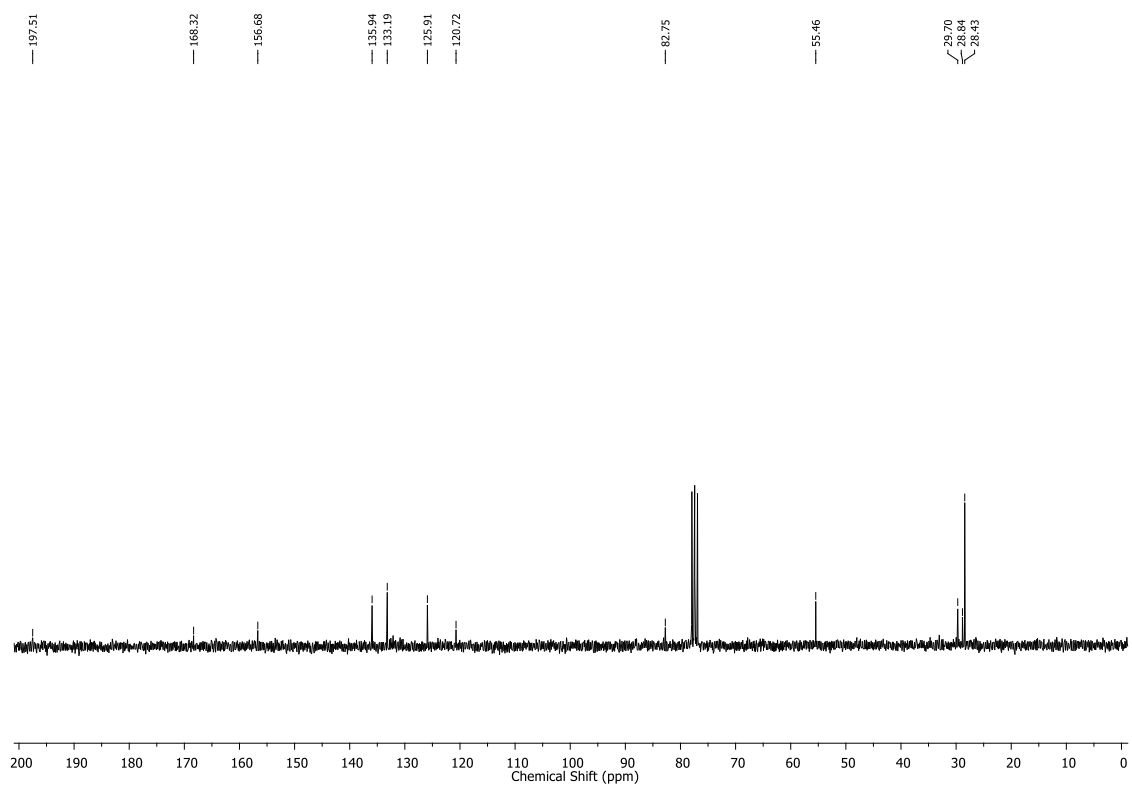



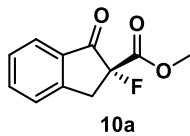

**$^1\text{H}$  NMR (250 MHz,  $\text{CDCl}_3$ ), HPLC and  $^{19}\text{F}$  NMR(235 MHz,  $\text{CDCl}_3$ )**

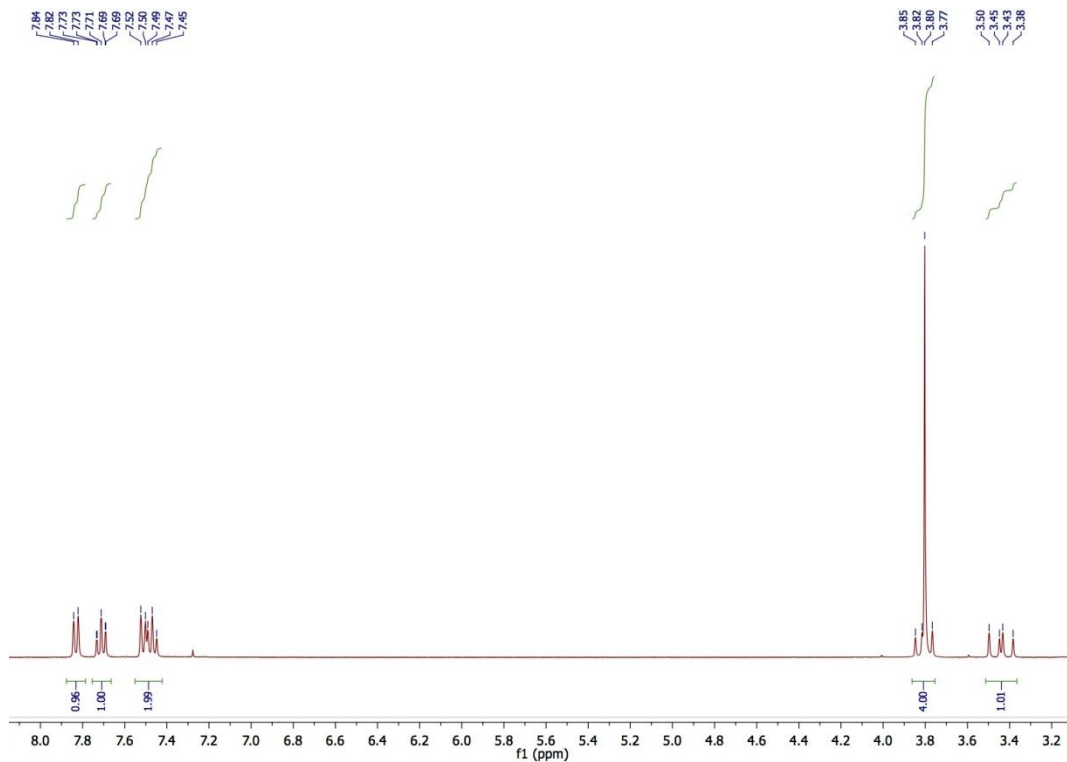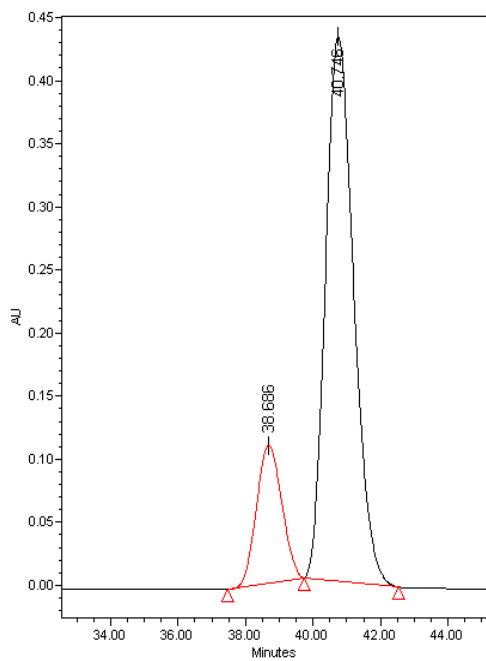

|   | Retention Time (min) | Purity1 Angle | Purity1 Threshold | PDA/FLR Match1 Spect. Name | PDA/FLR Match1 Angle | PDA/FLR Match1 Threshold | PDA/FLR Match1 Lib. Name | Area ( $\mu\text{V}^2\text{sec}$ ) | % Area |
|---|----------------------|---------------|-------------------|----------------------------|----------------------|--------------------------|--------------------------|------------------------------------|--------|
| 1 | 38.686               |               |                   |                            |                      |                          |                          | 5689646                            | 18.55  |
| 2 | 40.746               |               |                   |                            |                      |                          |                          | 24989421                           | 81.45  |

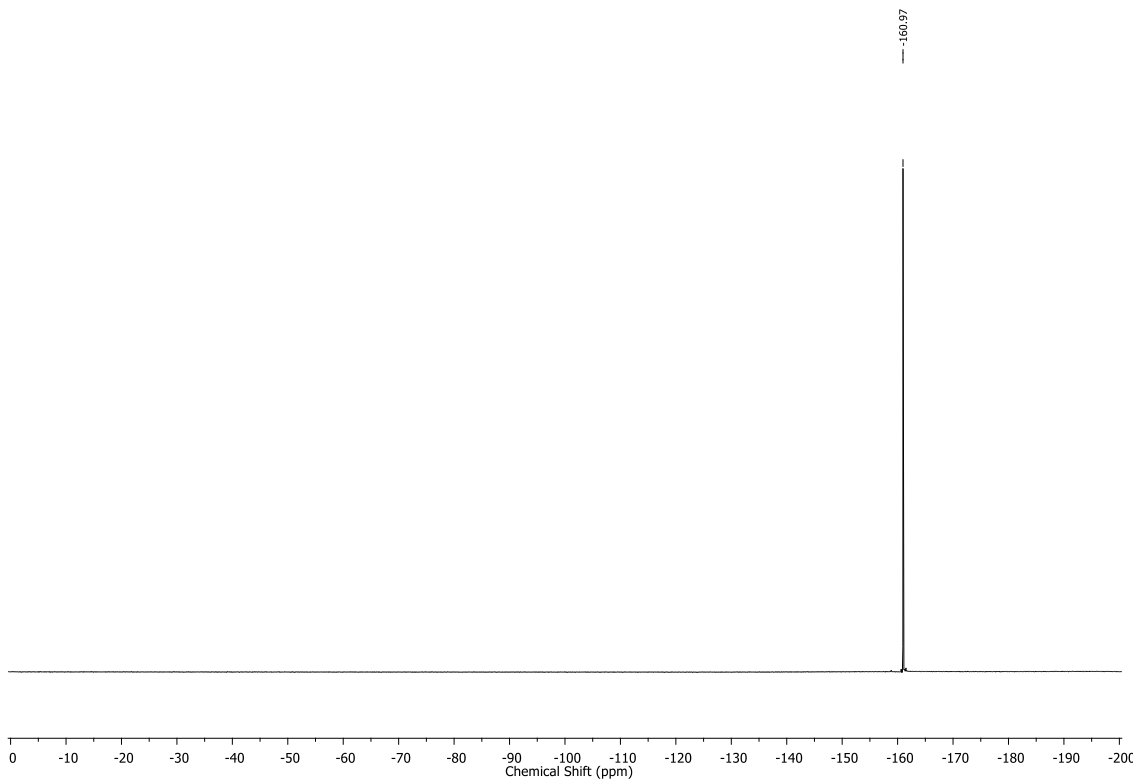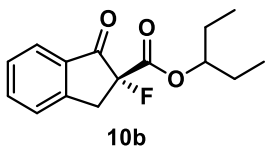

**<sup>1</sup>H NMR (250 Mz, CDCl<sub>3</sub>)**

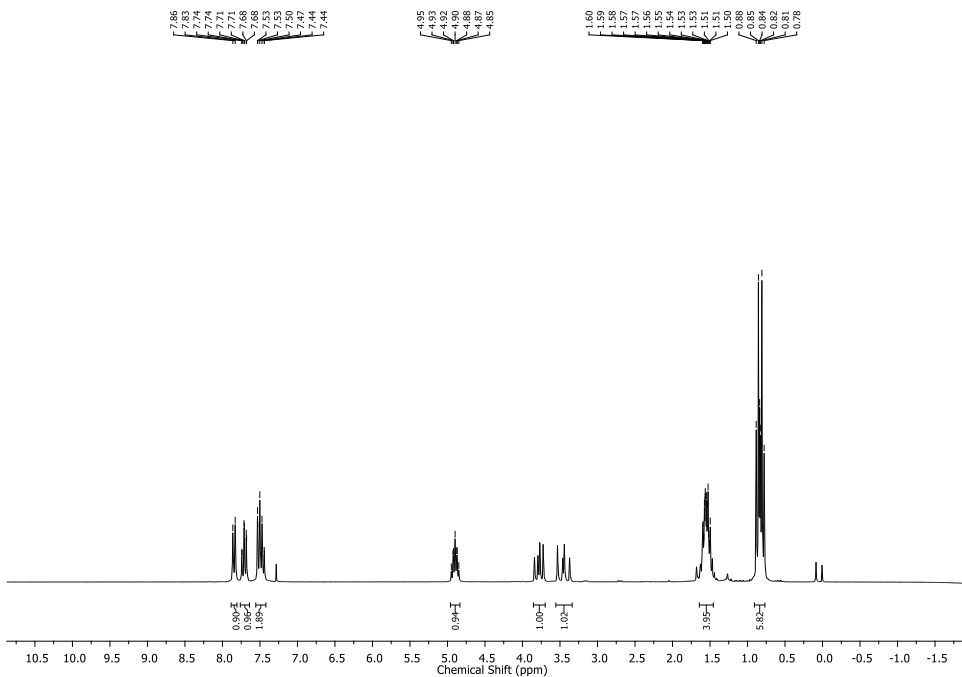

**$^{13}\text{C}$  NMR(91 MHz,  $\text{CDCl}_3$ )**

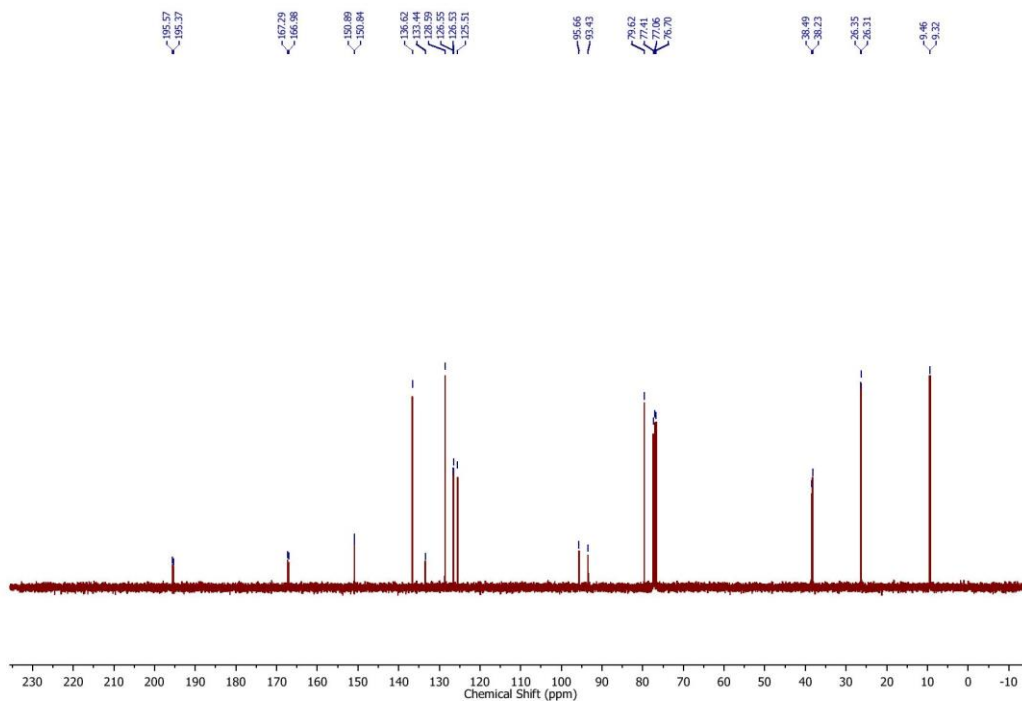

**$^{19}\text{F}$  NMR(235 MHz,  $\text{CDCl}_3$ )**

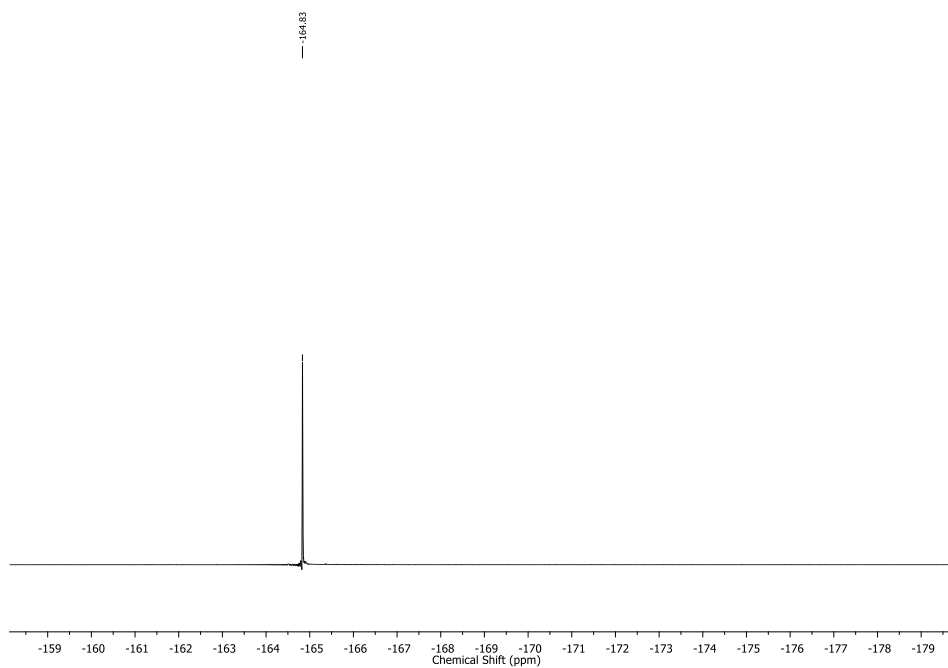

## IR (ATR)

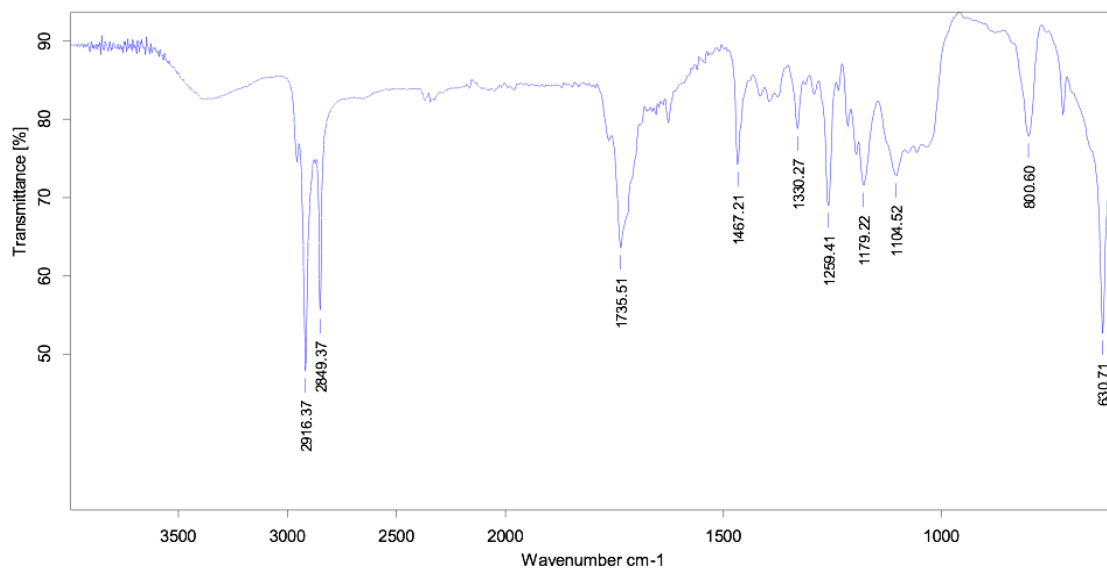

## HPLC

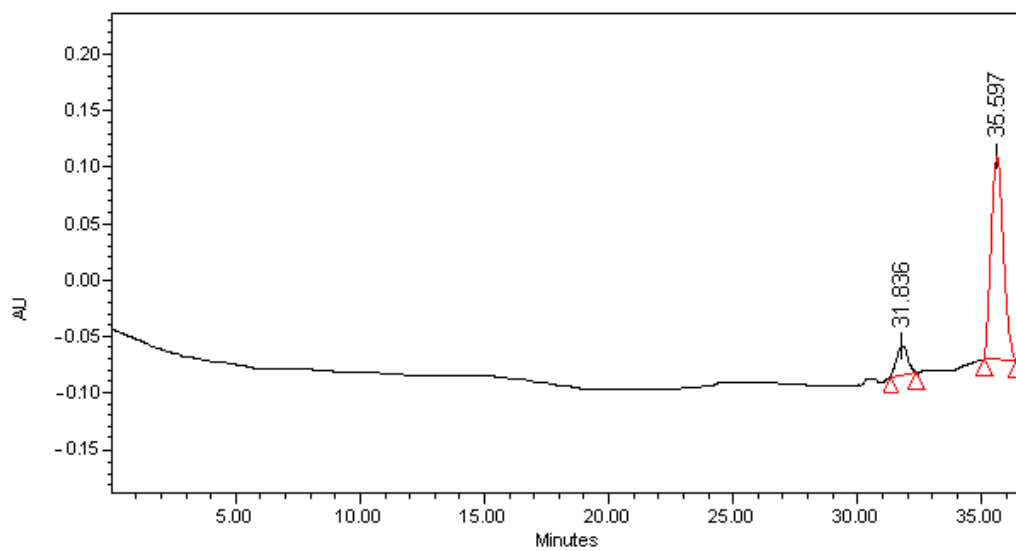

| Name | Retention Time (min) | Area ( $\mu\text{V}\cdot\text{sec}$ ) | % Area | Height ( $\mu\text{V}$ ) | Int Type |
|------|----------------------|---------------------------------------|--------|--------------------------|----------|
| 1    | 31.836               | 7651                                  | 11.09  | 261                      | bb       |
| 2    | 35.597               | 61347                                 | 88.91  | 1806                     | bb       |

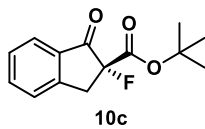

**<sup>1</sup>H NMR (250 MHz, CDCl<sub>3</sub>)**

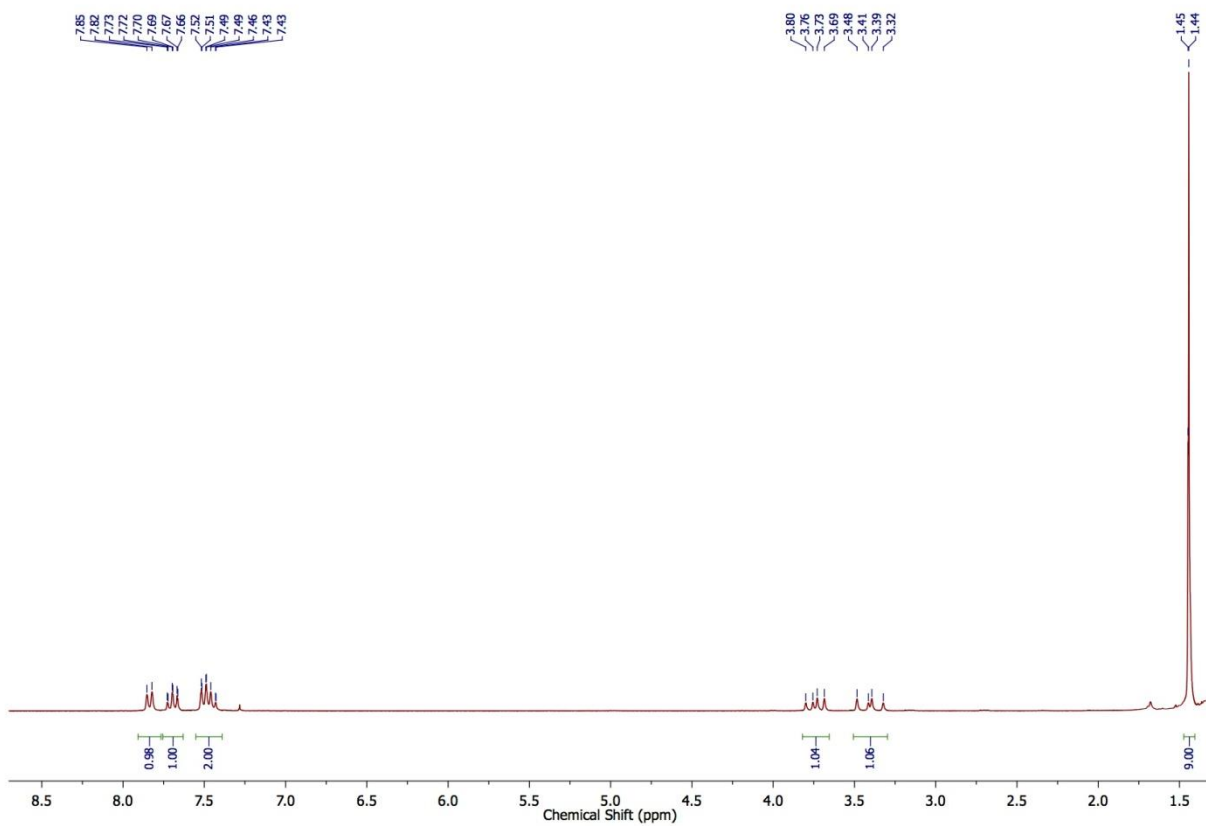

**<sup>19</sup>F NMR (235 MHz, CDCl<sub>3</sub>)**

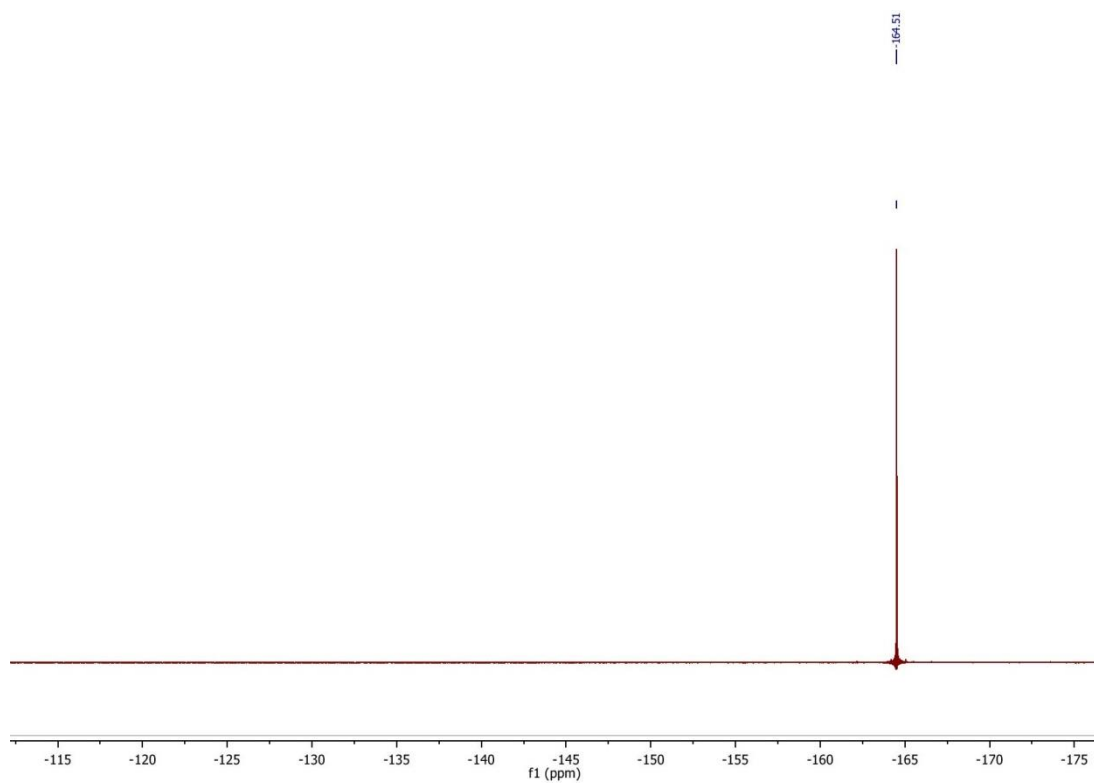

## HPLC

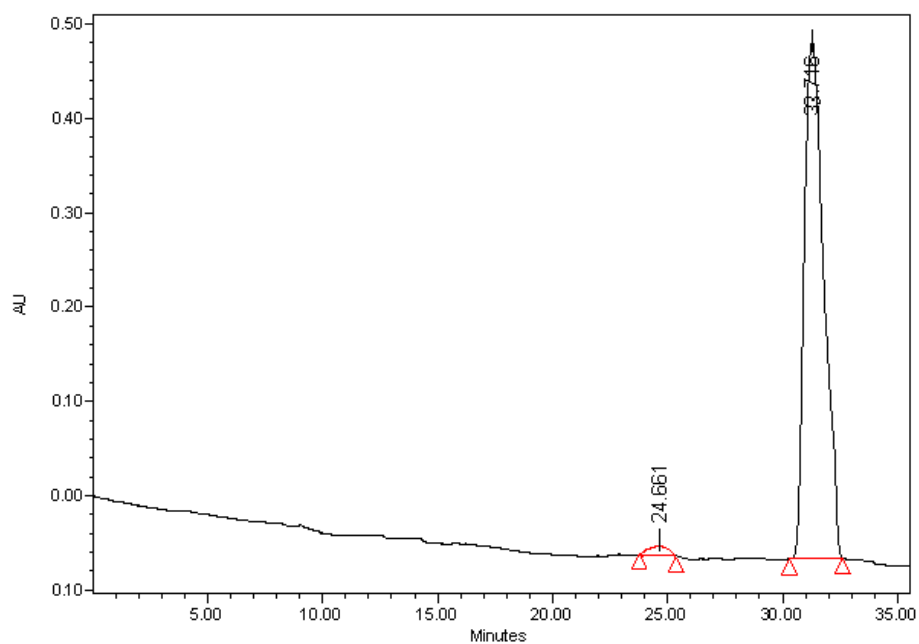

| Name | Retention Time (min) | Area ( $\mu\text{V}\cdot\text{sec}$ ) | % Area | Height ( $\mu\text{V}$ ) | Int Type |
|------|----------------------|---------------------------------------|--------|--------------------------|----------|
| 1    | 24.661               | 97730                                 | 2.49   | 719                      | bb       |
| 2    | 33.761               | 3831190                               | 97.51  | 24433                    | bb       |

## CD (MeCN, 25°C)

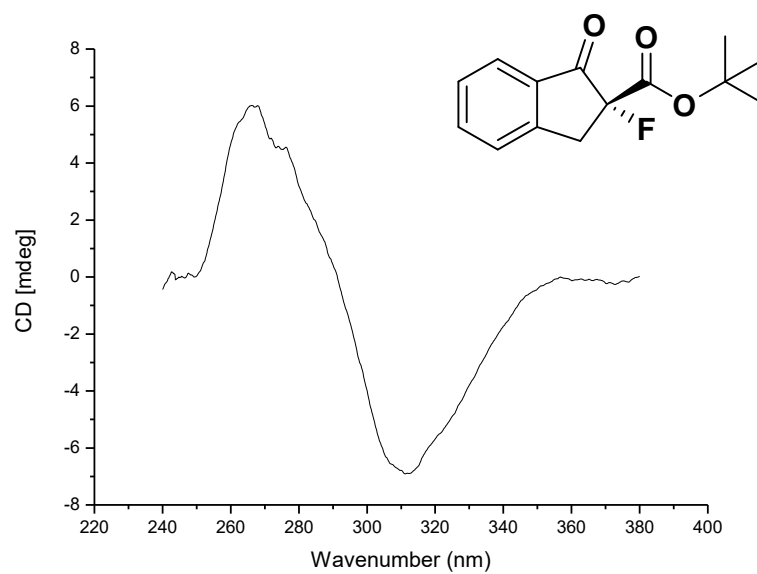

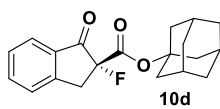

**$^1\text{H}$  NMR (250 MHz,  $\text{CDCl}_3$ )**

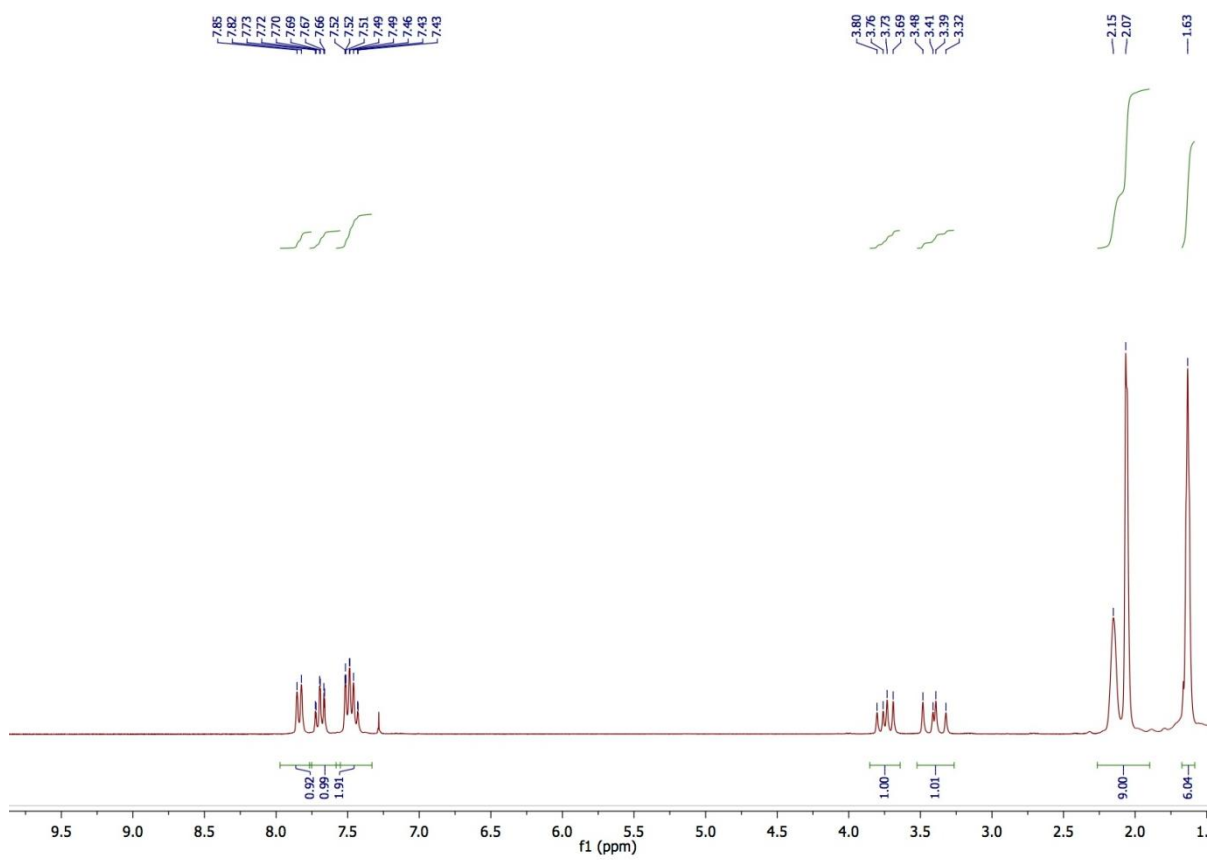

**$^{19}\text{F}$  NMR (235 MHz,  $\text{CDCl}_3$ )**

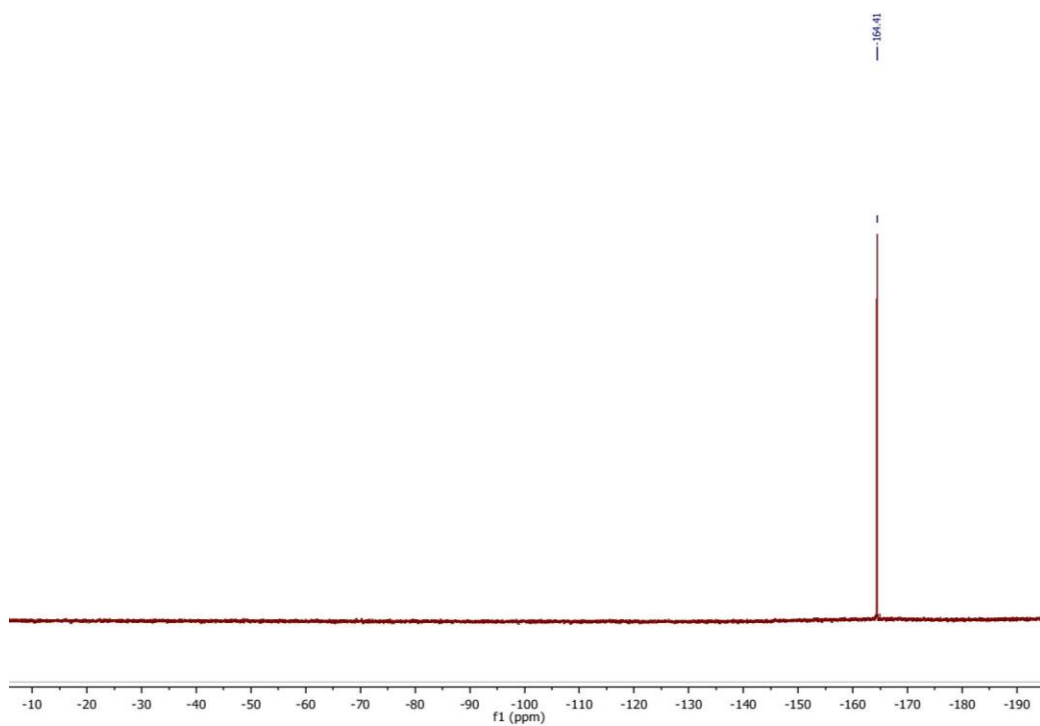

# HPLC

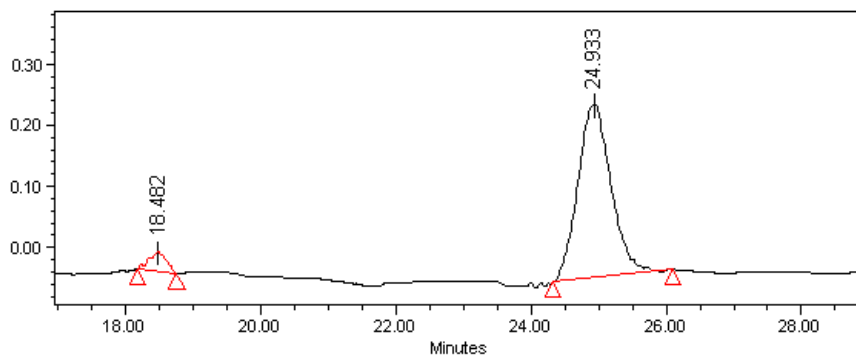

| # | Name | Retention Time (min) | Area (μV*sec) | % Area | Height (μV) | Int Type |
|---|------|----------------------|---------------|--------|-------------|----------|
| 1 |      | 18.482               | 2699          | 5.33   | 155         | bb       |
| 2 |      | 24.933               | 47939         | 94.67  | 1411        | bb       |

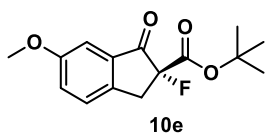

## <sup>1</sup>H NMR (250 MHz, CDCl<sub>3</sub>)

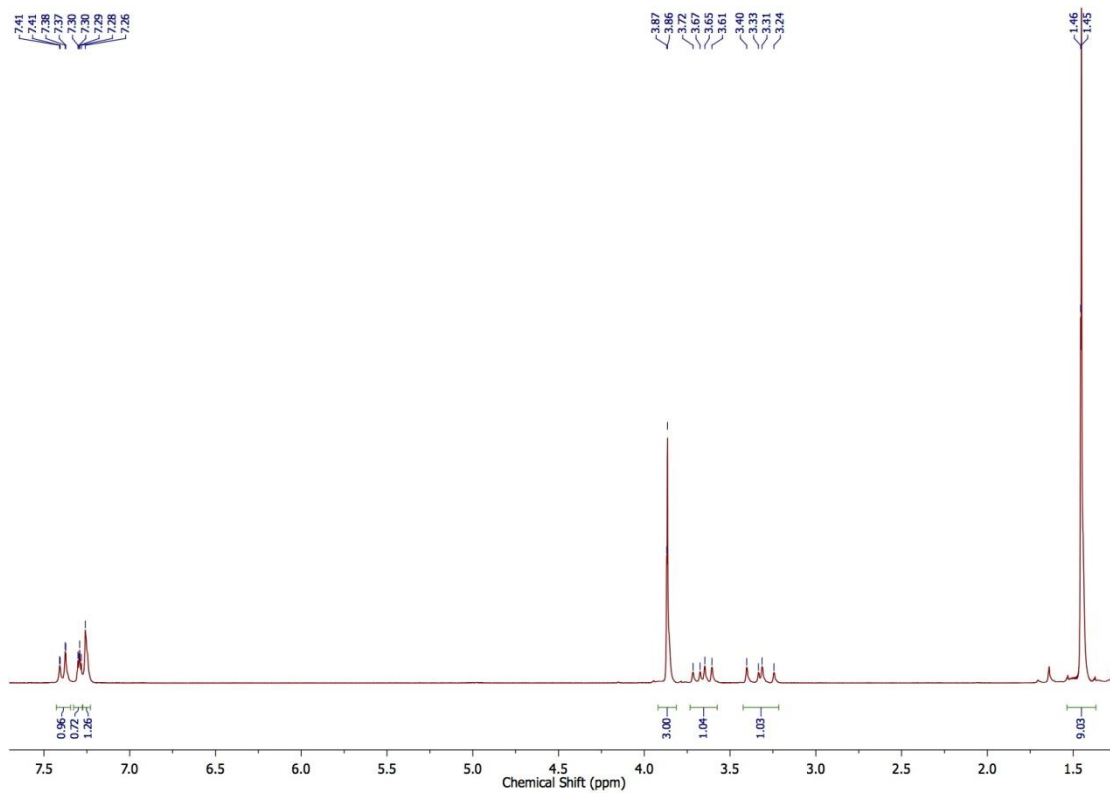



# <sup>19</sup>F NMR (235 MHz, CDCl<sub>3</sub>)

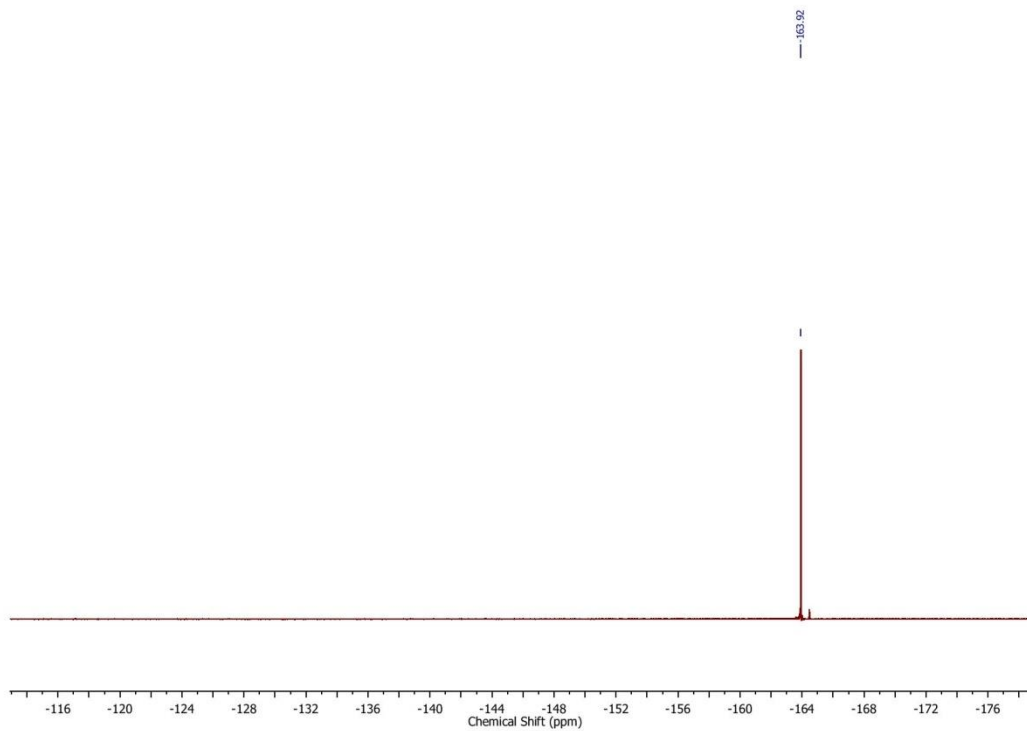

## HPLC

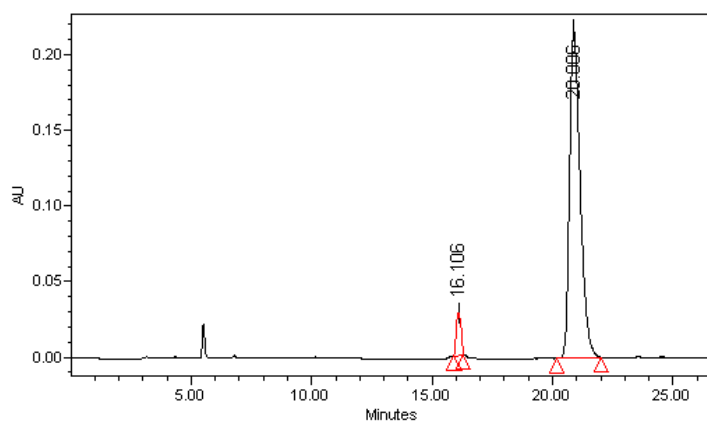

| Name | Retention Time (min) | Area (μV*sec) | % Area | Height (μV) | Int Type |
|------|----------------------|---------------|--------|-------------|----------|
| 1    | 16.106               | 399058        | 5.69   | 28434       | bb       |
| 2    | 20.886               | 6619515       | 94.31  | 216558      | bb       |

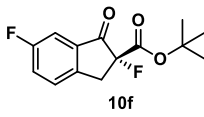

**<sup>1</sup>H NMR (250 MHz, CDCl<sub>3</sub>)**

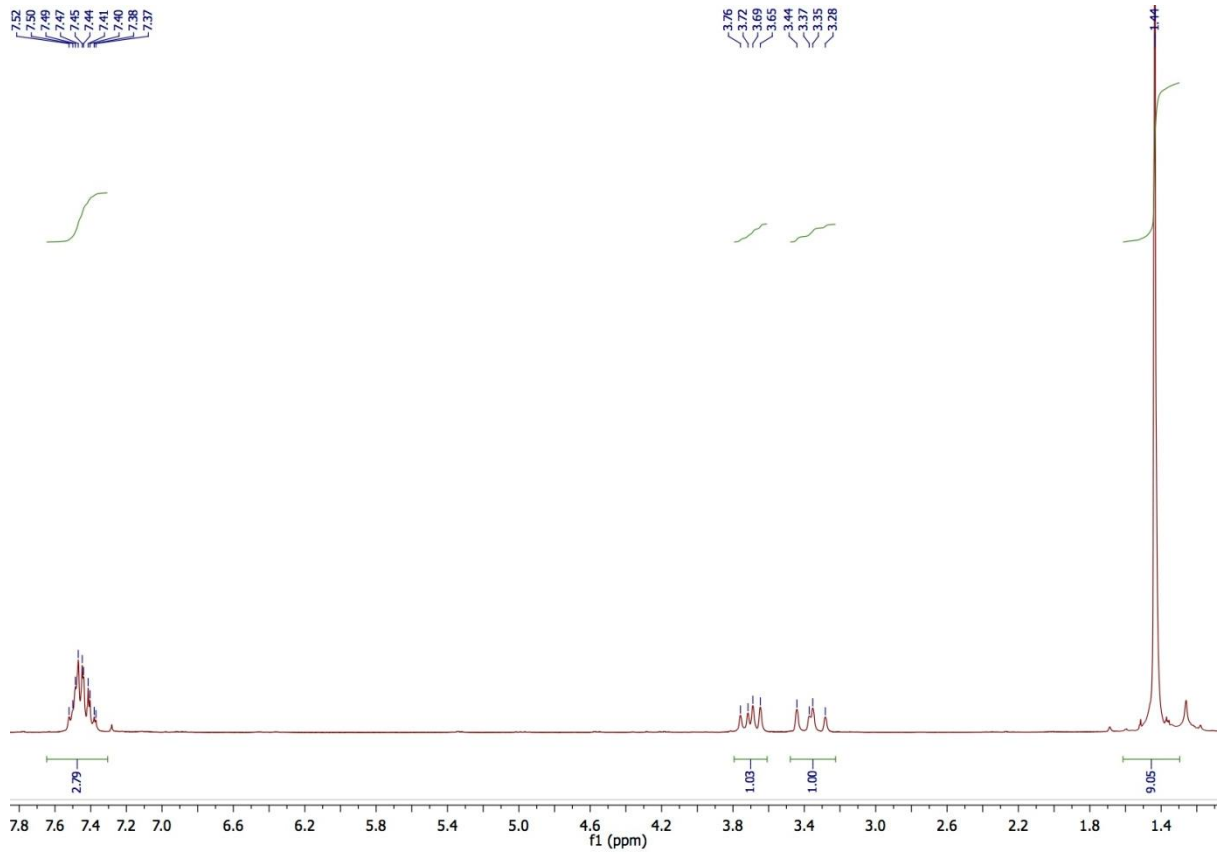

**<sup>19</sup>F NMR (235 MHz, CDCl<sub>3</sub>)**

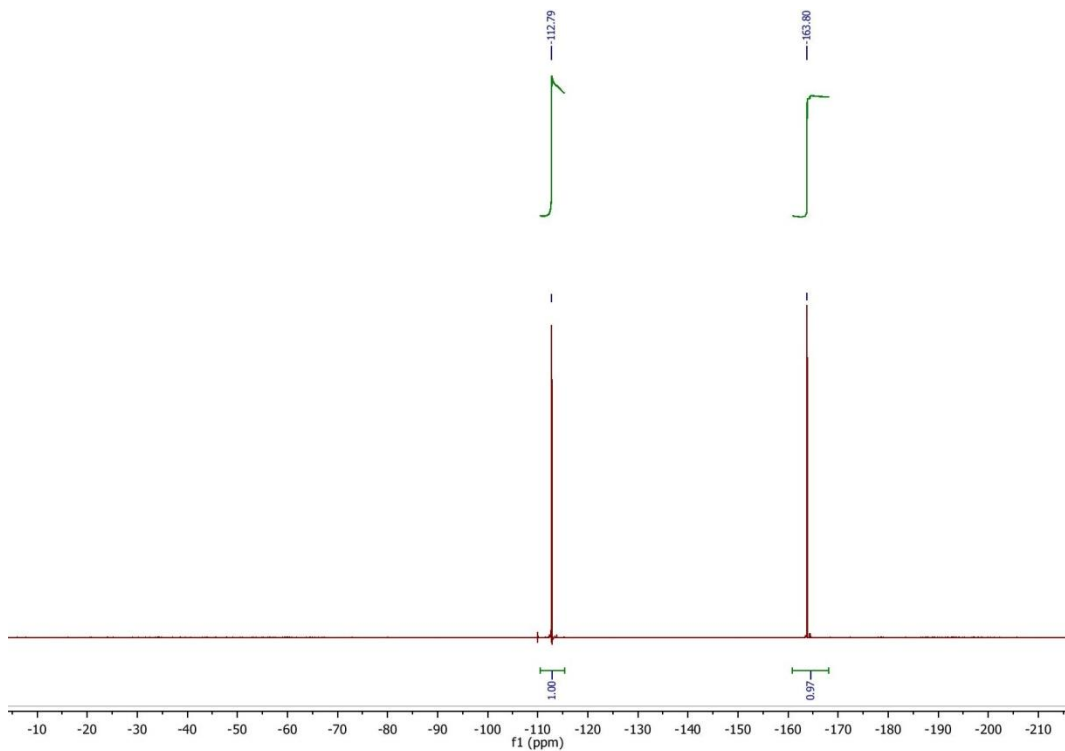

# HPLC

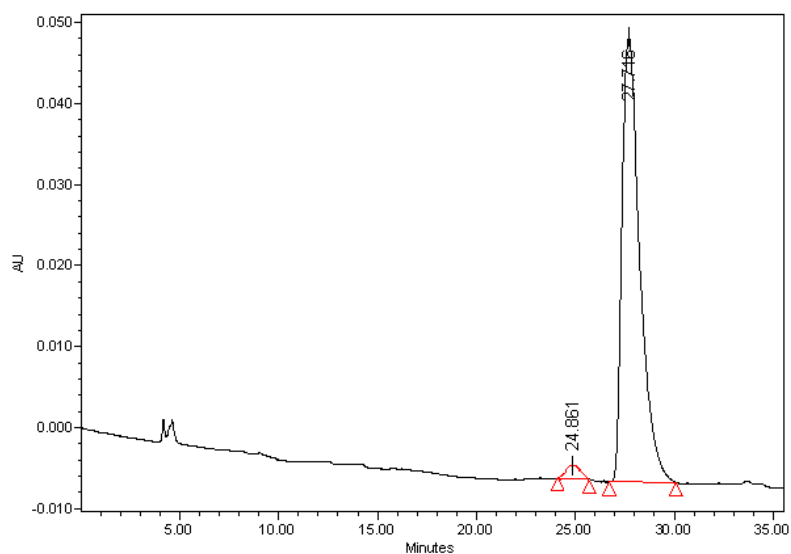

| Name | Retention Time (min) | Area ( $\mu\text{V}\cdot\text{sec}$ ) | % Area | Height ( $\mu\text{V}$ ) | Int Type |
|------|----------------------|---------------------------------------|--------|--------------------------|----------|
| 1    | 24.425               | 129898                                | 3.65   | -3094                    | bb       |
| 2    | 27.861               | 3429908                               | 96.35  | 54929                    | bb       |

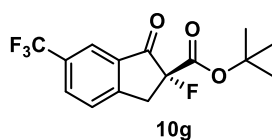

$^1\text{H}$  NMR (360 MHz,  $\text{CDCl}_3$ )

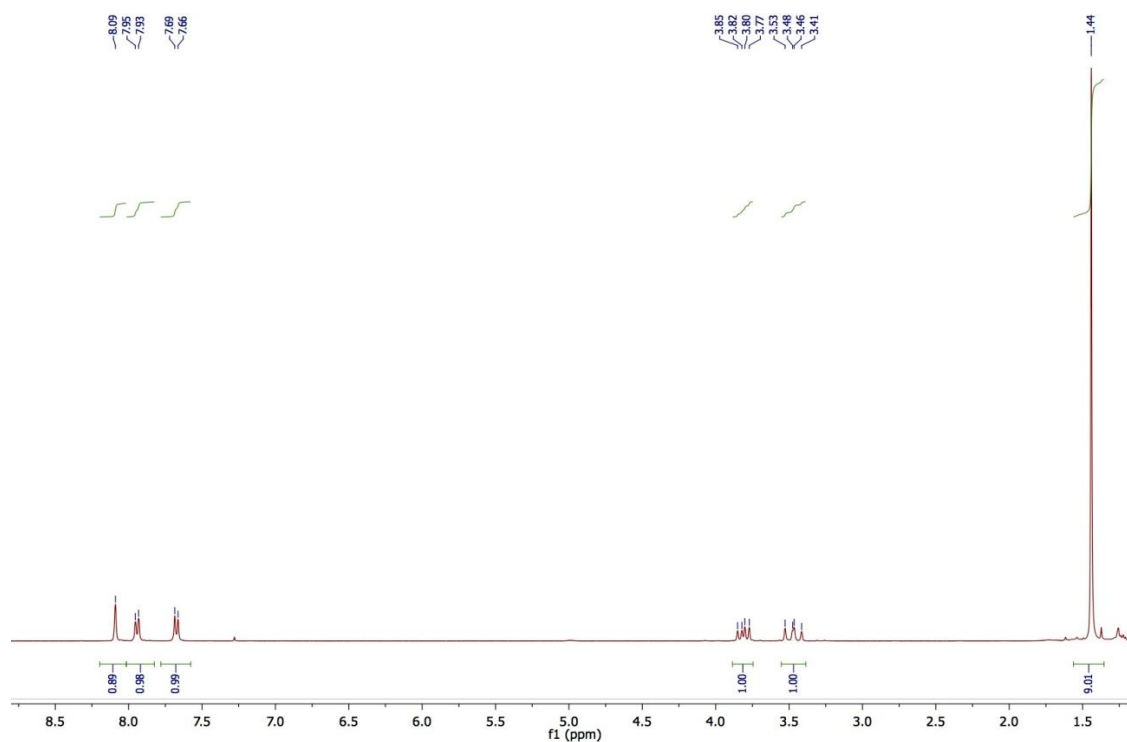

### <sup>13</sup>C NMR (91 MHz, CDCl<sub>3</sub>)

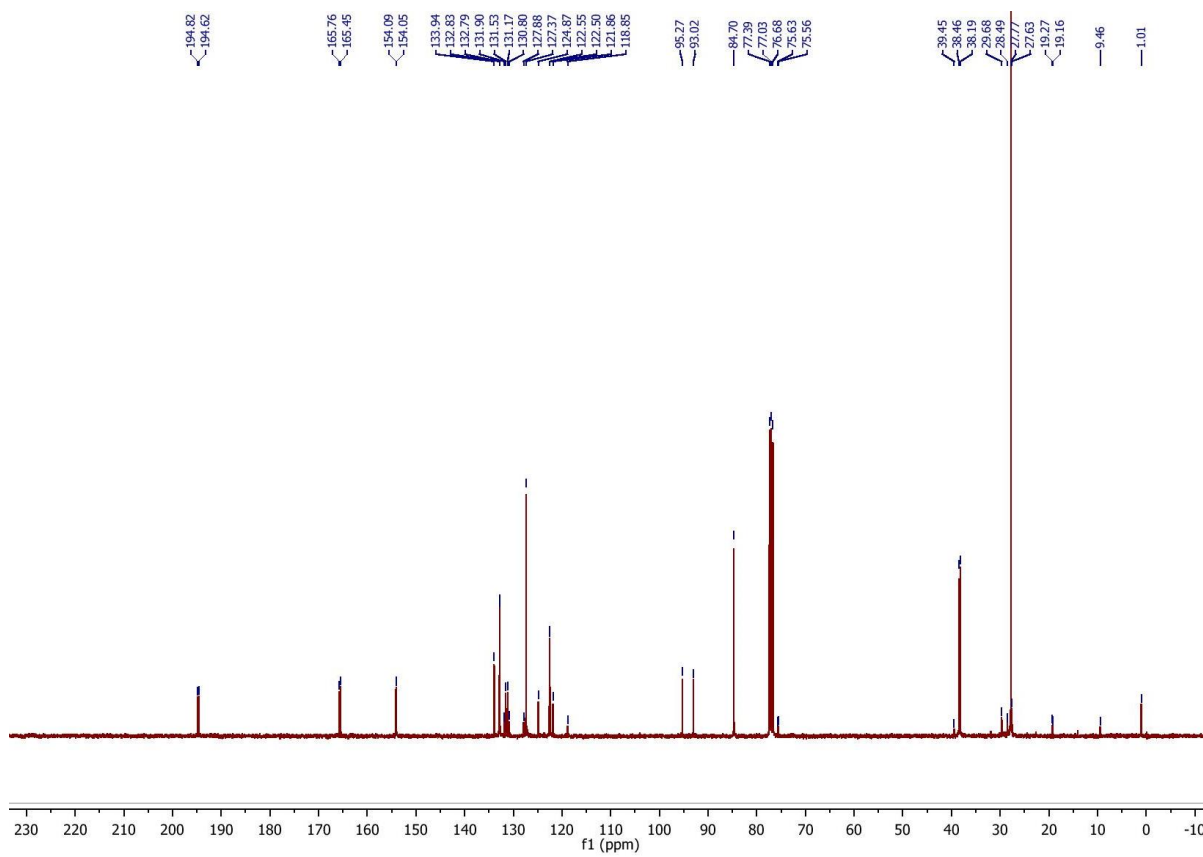

### <sup>19</sup>F NMR (235 MHz, CDCl<sub>3</sub>)

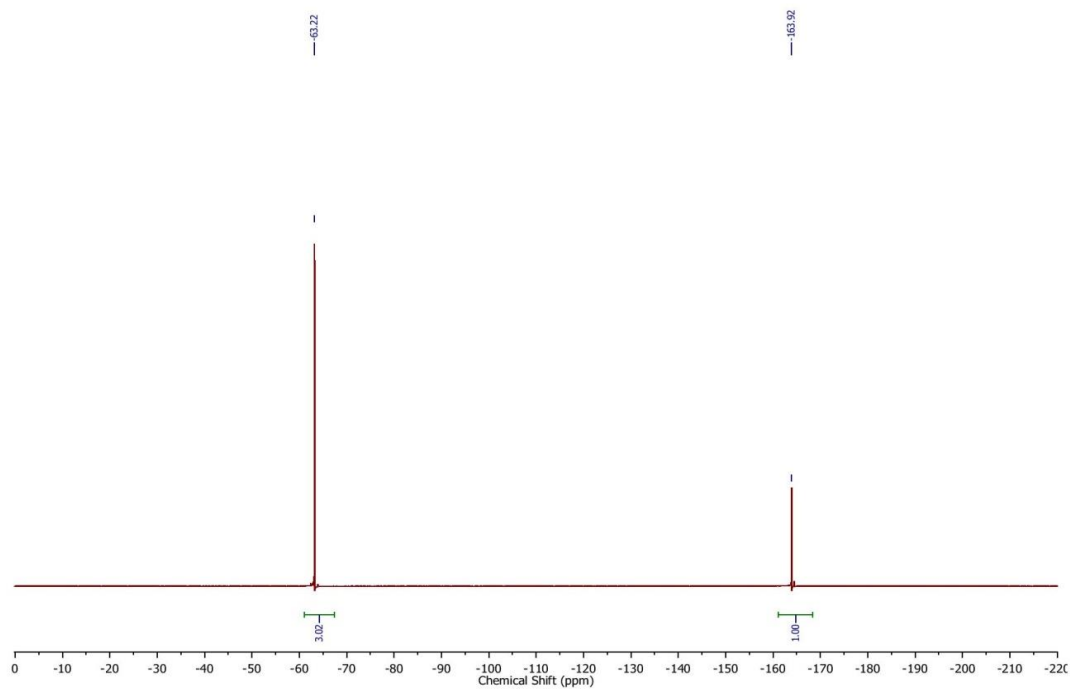

## IR

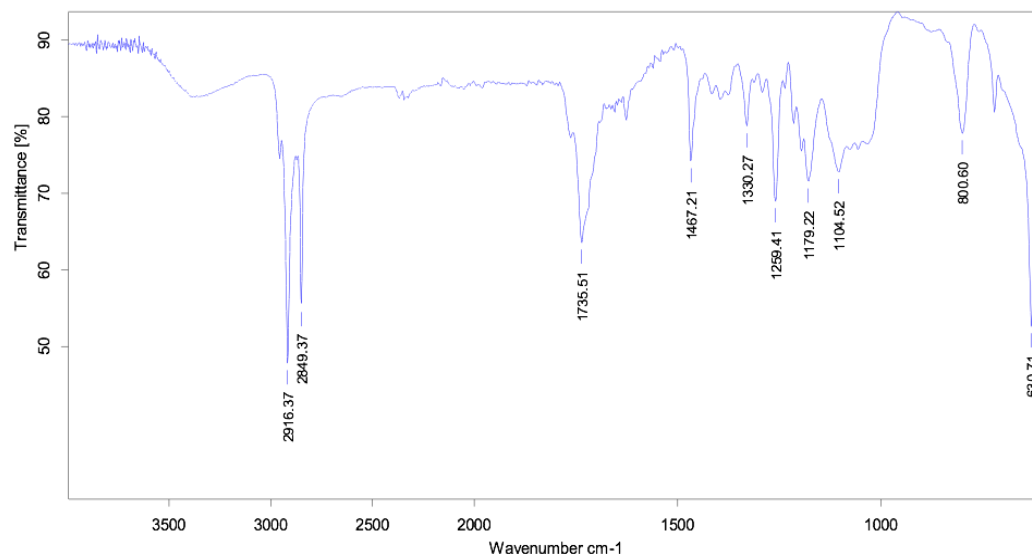

## HPLC

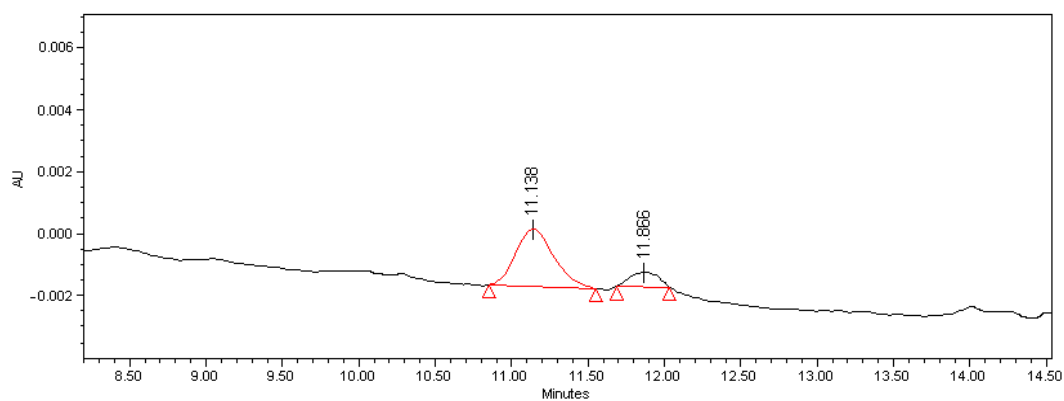

| Name | Retention Time (min) | Area ( $\mu\text{V}\cdot\text{sec}$ ) | % Area | Height ( $\mu\text{V}$ ) | Int Type |
|------|----------------------|---------------------------------------|--------|--------------------------|----------|
| 1    | 11.138               | 32332                                 | 91.40  | 1850                     | bb       |
| 2    | 11.866               | 3040                                  | 8.60   | 281                      | bb       |

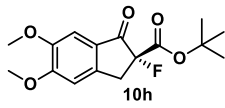

**<sup>1</sup>H NMR (360 MHz, CDCl<sub>3</sub>)**

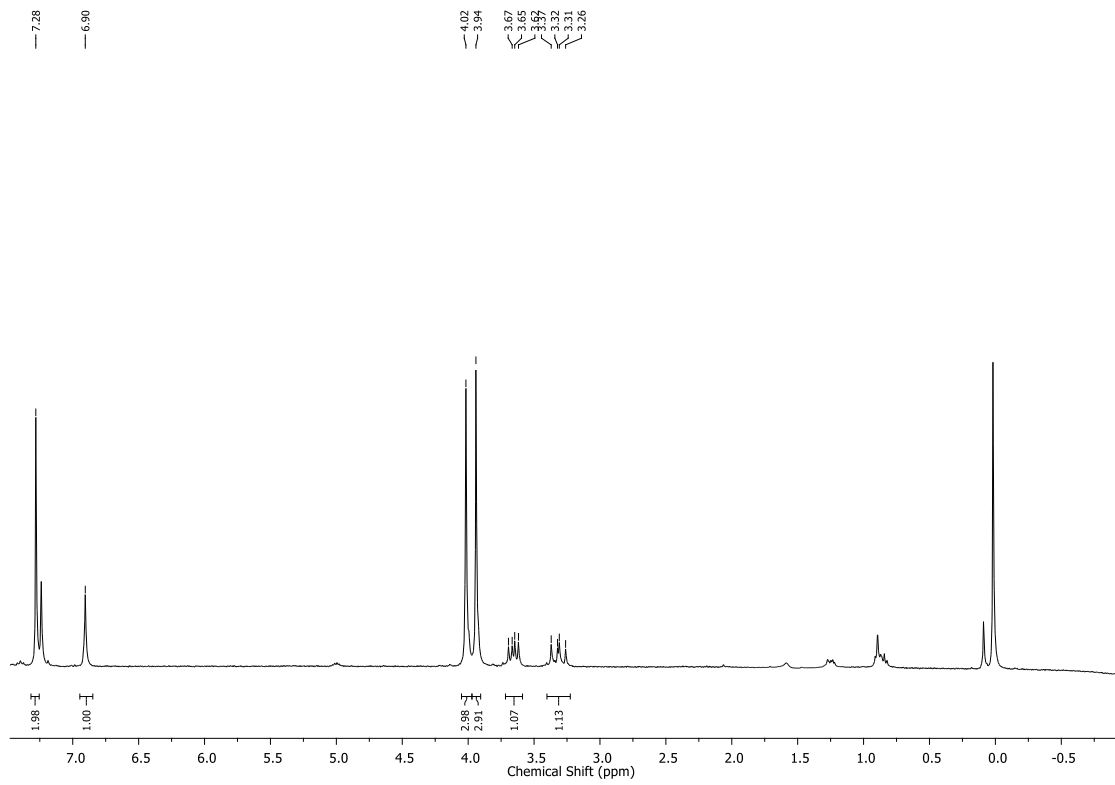

**<sup>19</sup>F NMR (235 MHz, CDCl<sub>3</sub>)**

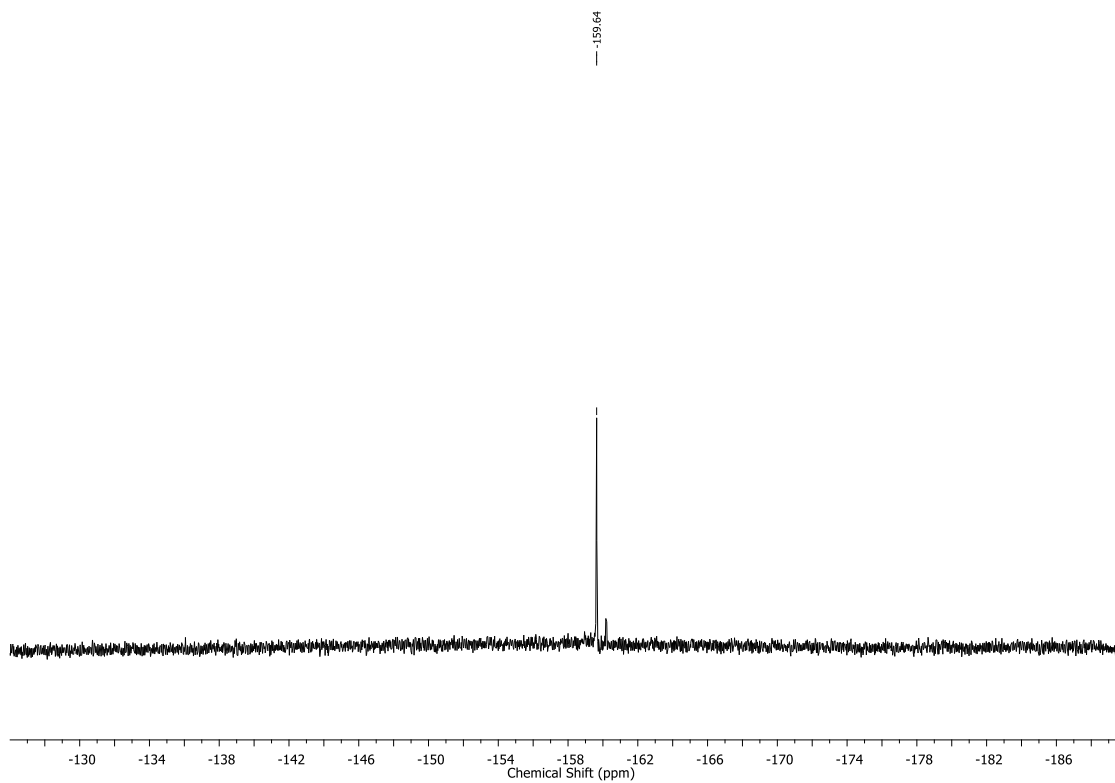

## HPLC

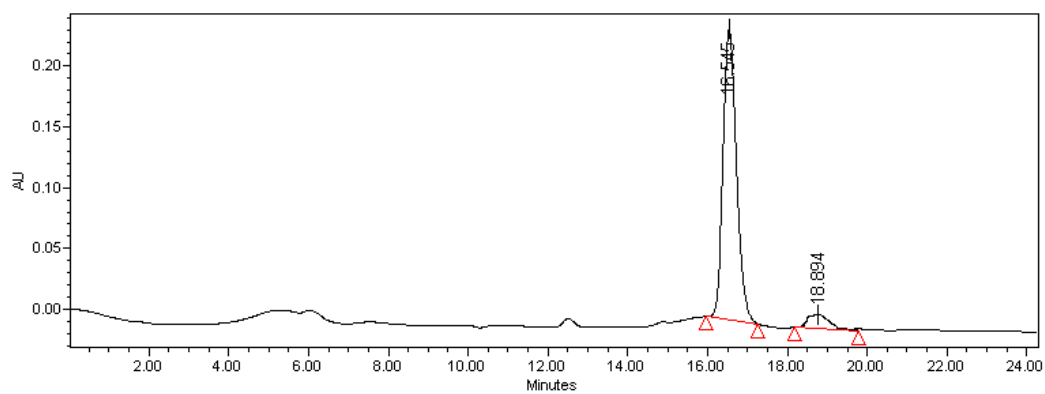

| Name | Retention Time (min) | Area ( $\mu\text{V}^2\text{sec}$ ) | % Area | Height ( $\mu\text{V}$ ) | Int Type |
|------|----------------------|------------------------------------|--------|--------------------------|----------|
| 1    | 16.545               | 4132861                            | 95.29  | 179762                   | bb       |
| 2    | 18.894               | 87838                              | 4.71   | 8601                     | bb       |

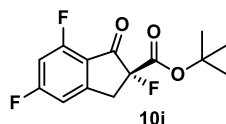

## $^1\text{H}$ NMR (400 MHz, $\text{CDCl}_3$ )

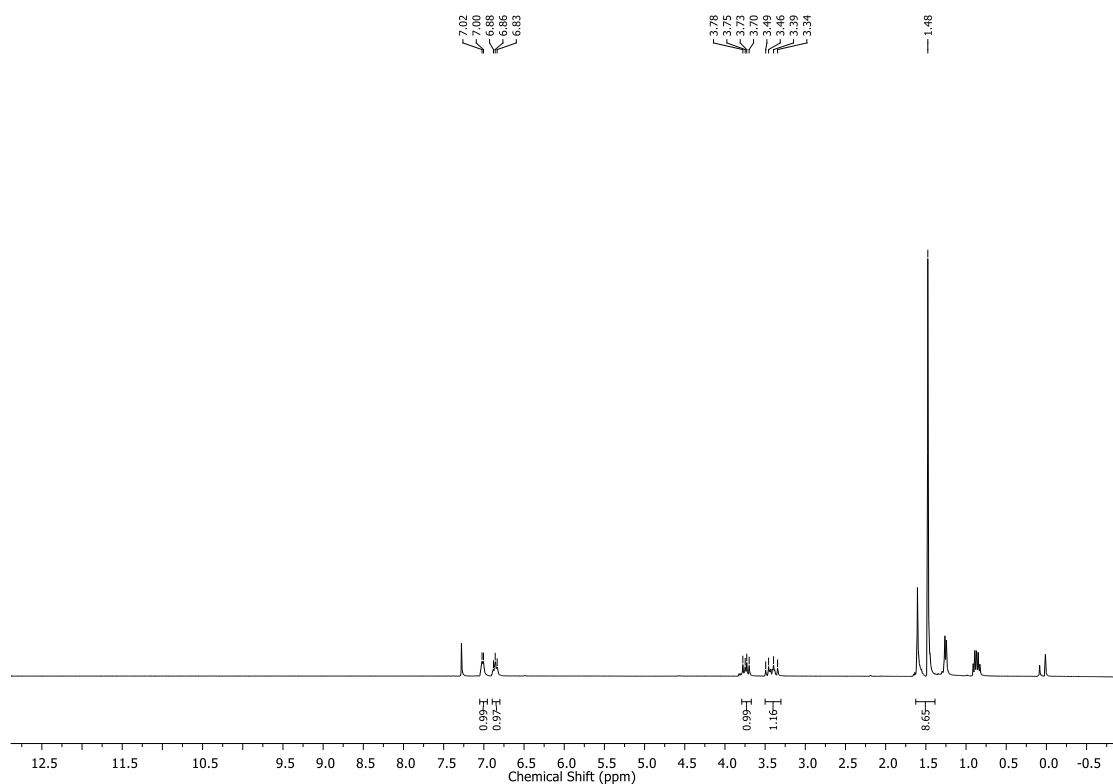

### $^{13}\text{C}$ NMR (101 MHz, $\text{CDCl}_3$ )

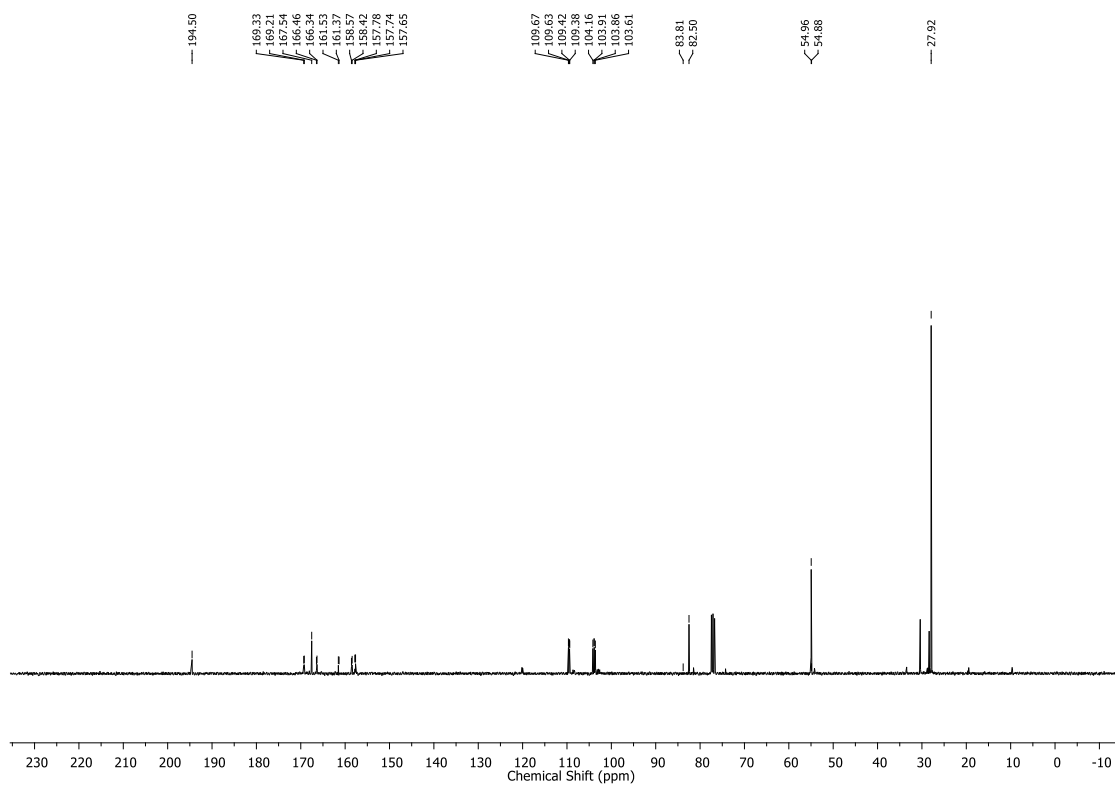

### $^{19}\text{F}$ NMR (376 MHz, $\text{CDCl}_3$ )

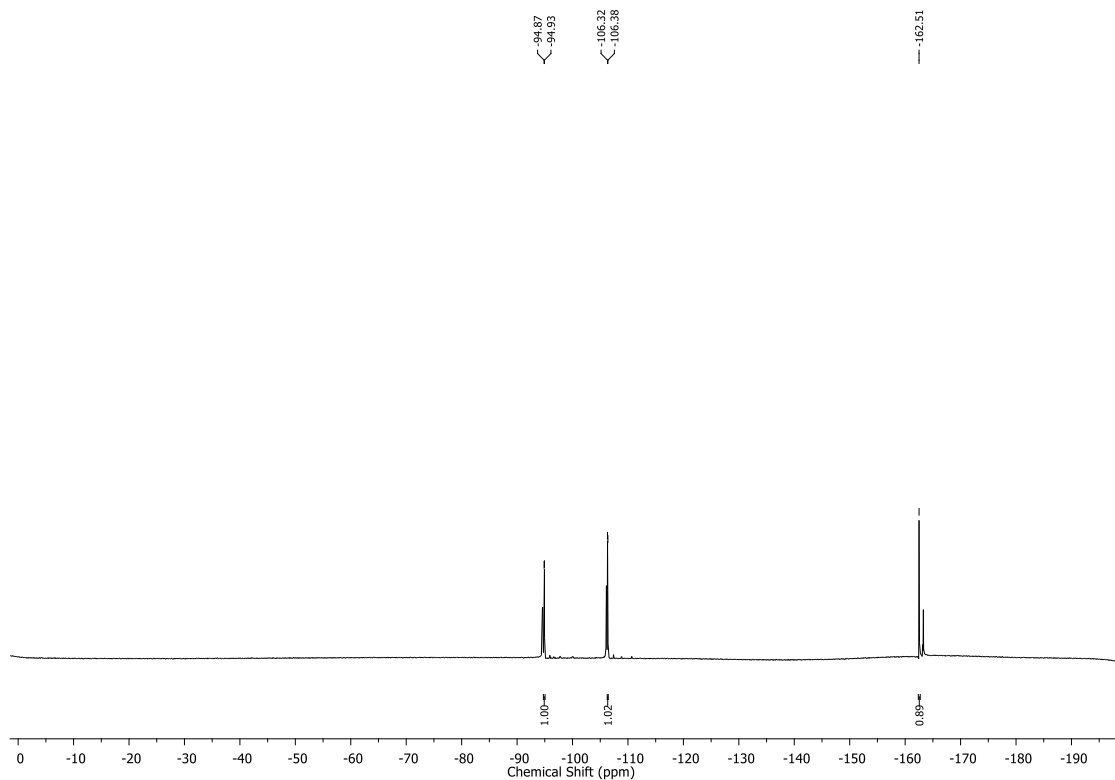



## HPLC

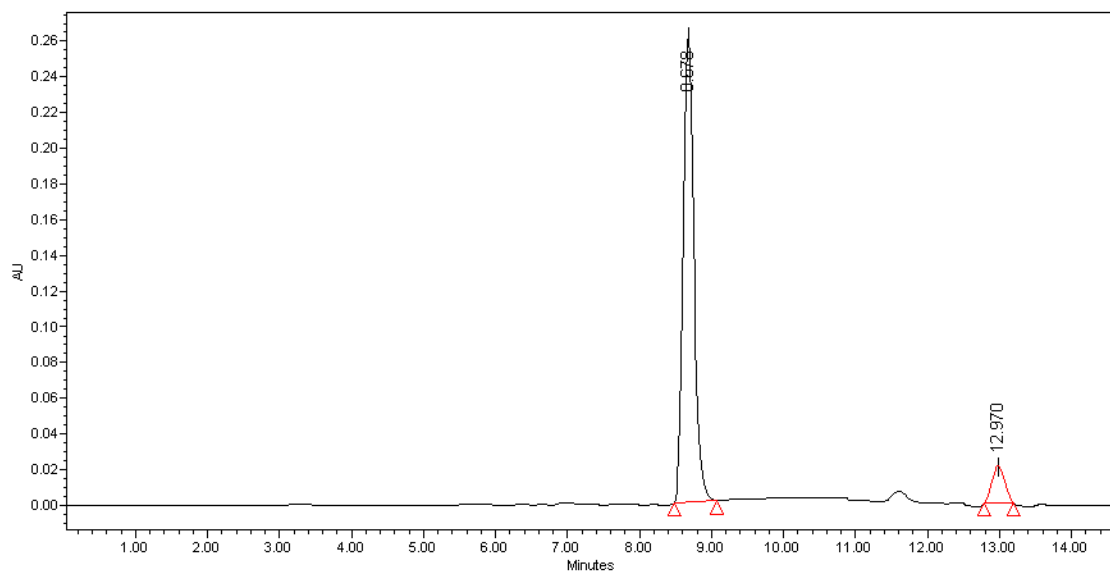

| Name | Retention Time (min) | Area ( $\mu\text{V}\cdot\text{sec}$ ) | % Area | Height ( $\mu\text{V}$ ) | Int Type |
|------|----------------------|---------------------------------------|--------|--------------------------|----------|
| 1    | 8.678                | 2677746                               | 91.18  | 261119                   | bb       |
| 2    | 12.970               | 259007                                | 8.82   | 20719                    | bb       |

## CD (MeCN, 25°C)

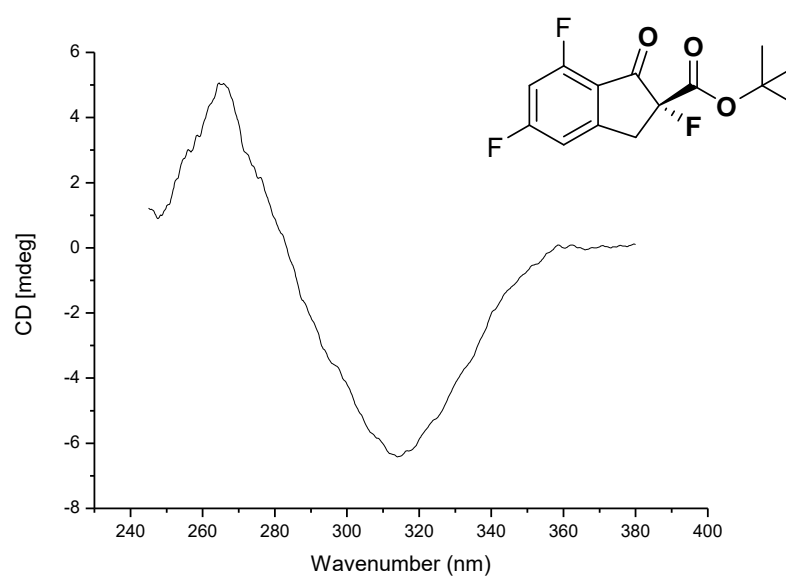

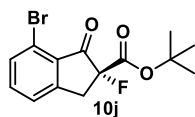

**$^1\text{H}$  NMR (360 MHz,  $\text{CDCl}_3$ )**

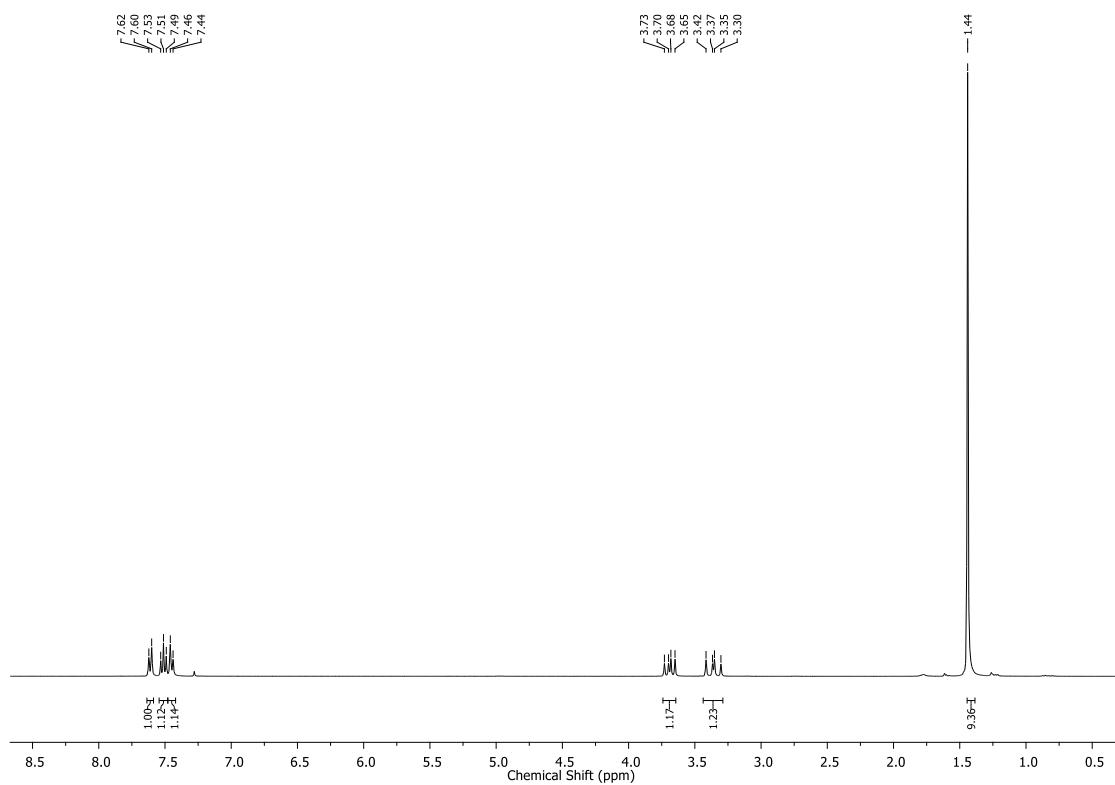

**$^{13}\text{C}$  NMR (91 MHz,  $\text{CDCl}_3$ )**

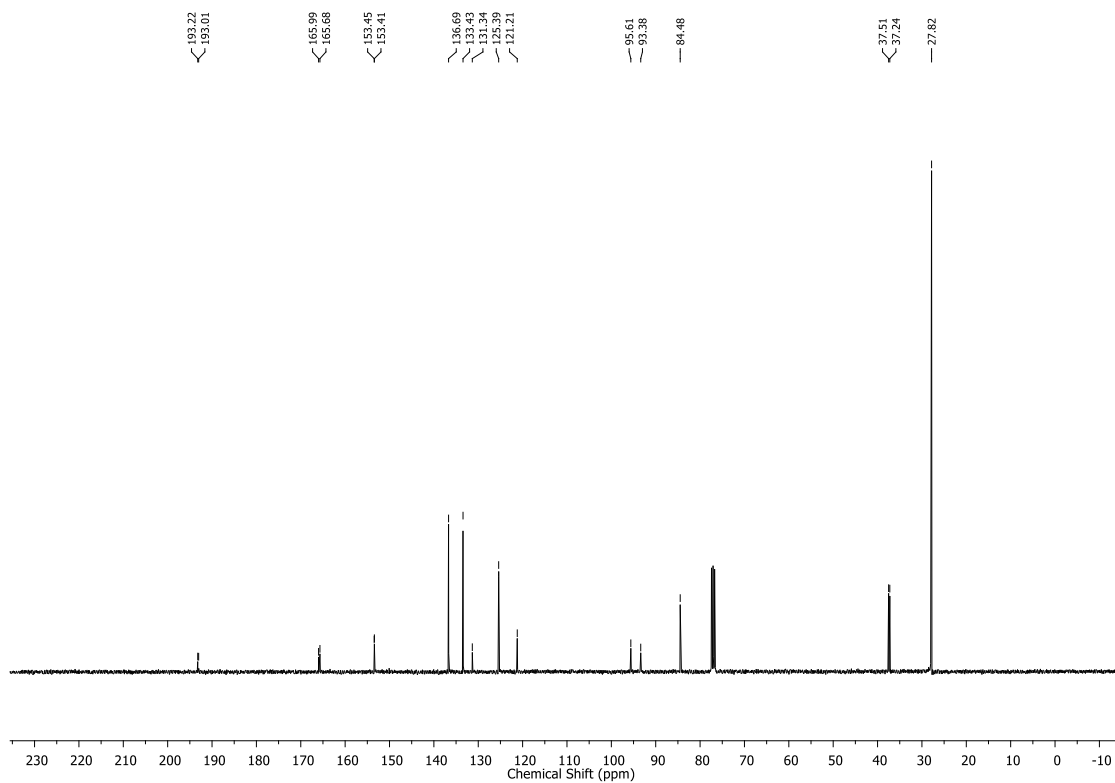

# <sup>19</sup>F NMR (235 MHz, CDCl<sub>3</sub>)

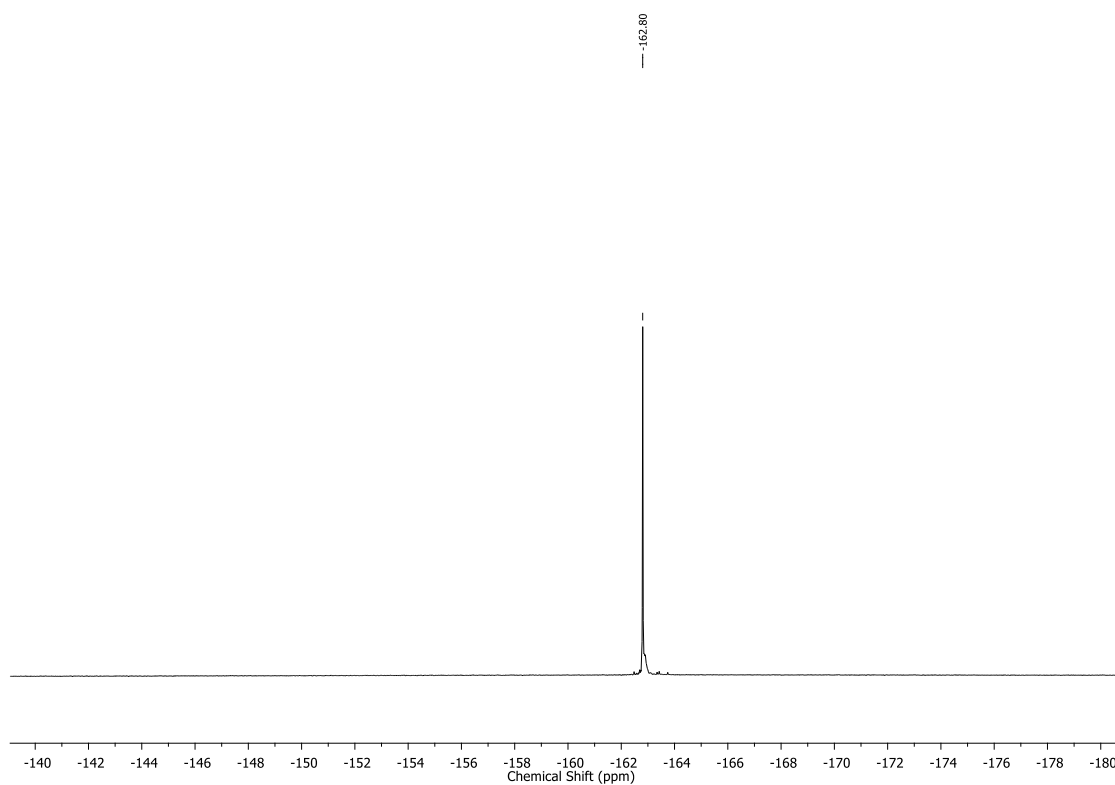

## HPLC

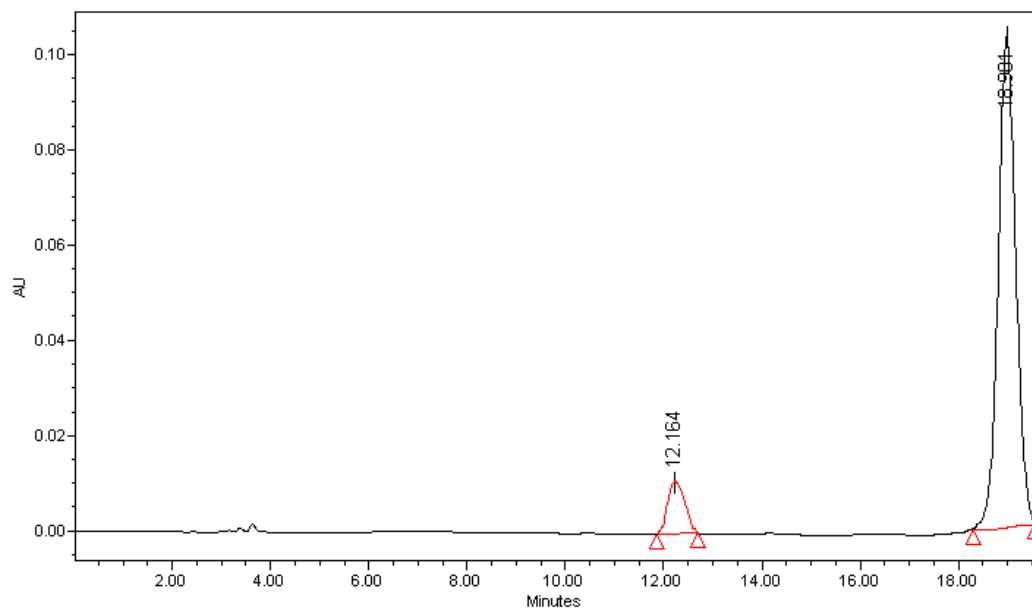

| Name | Retention Time (min) | Area (μV*sec) | % Area | Height (μV) | Int Type |
|------|----------------------|---------------|--------|-------------|----------|
| 1    | 18.113               | 184731        | 7.45   | 8991        | bb       |
| 2    | 12.164               | 2293772       | 92.55  | 97831       | bb       |

## CD (MeCN, 25°C)

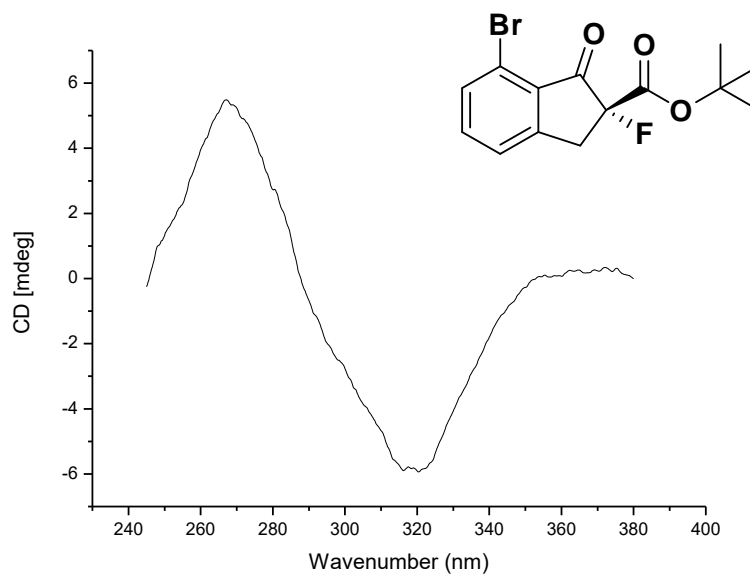

## IR (ATR)

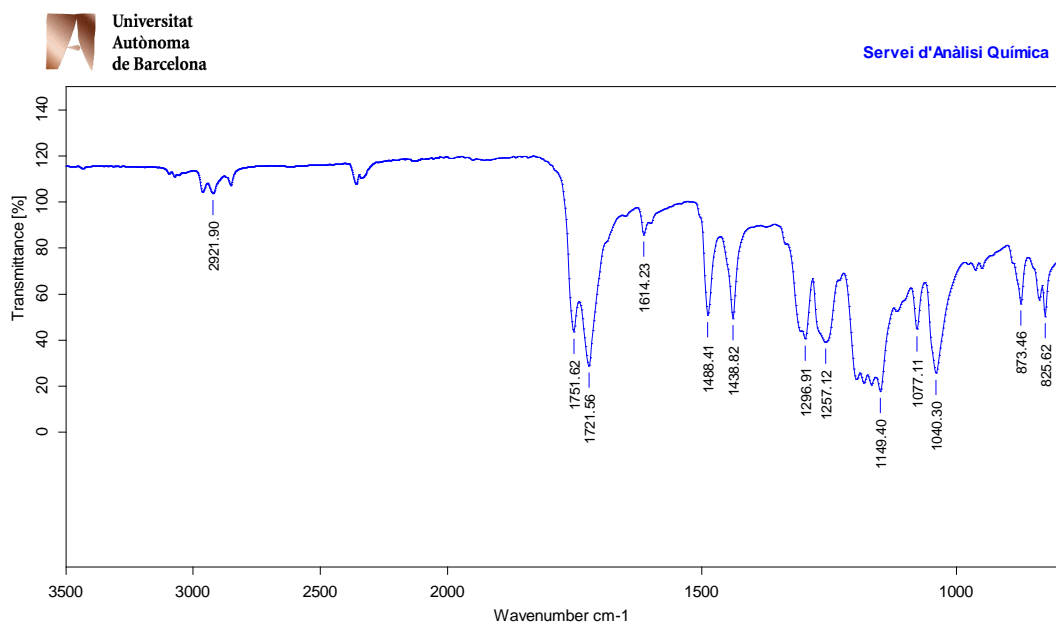

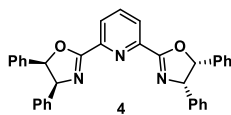

**<sup>1</sup>H NMR (250 MHz, CDCl<sub>3</sub>)**

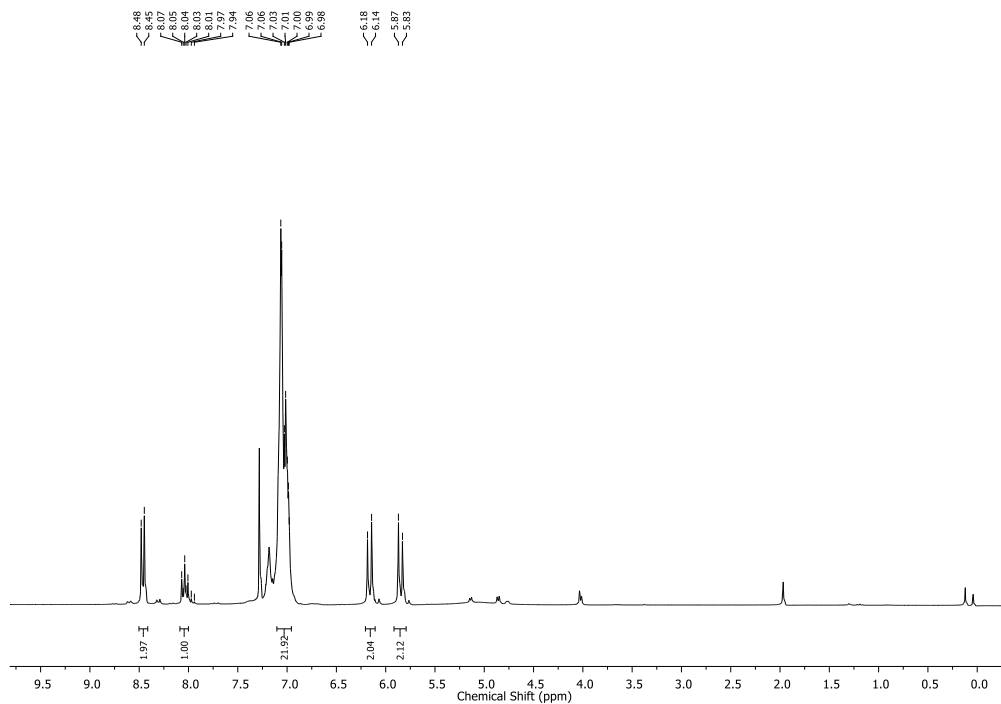

**<sup>13</sup>C NMR (63 MHz, CDCl<sub>3</sub>)**

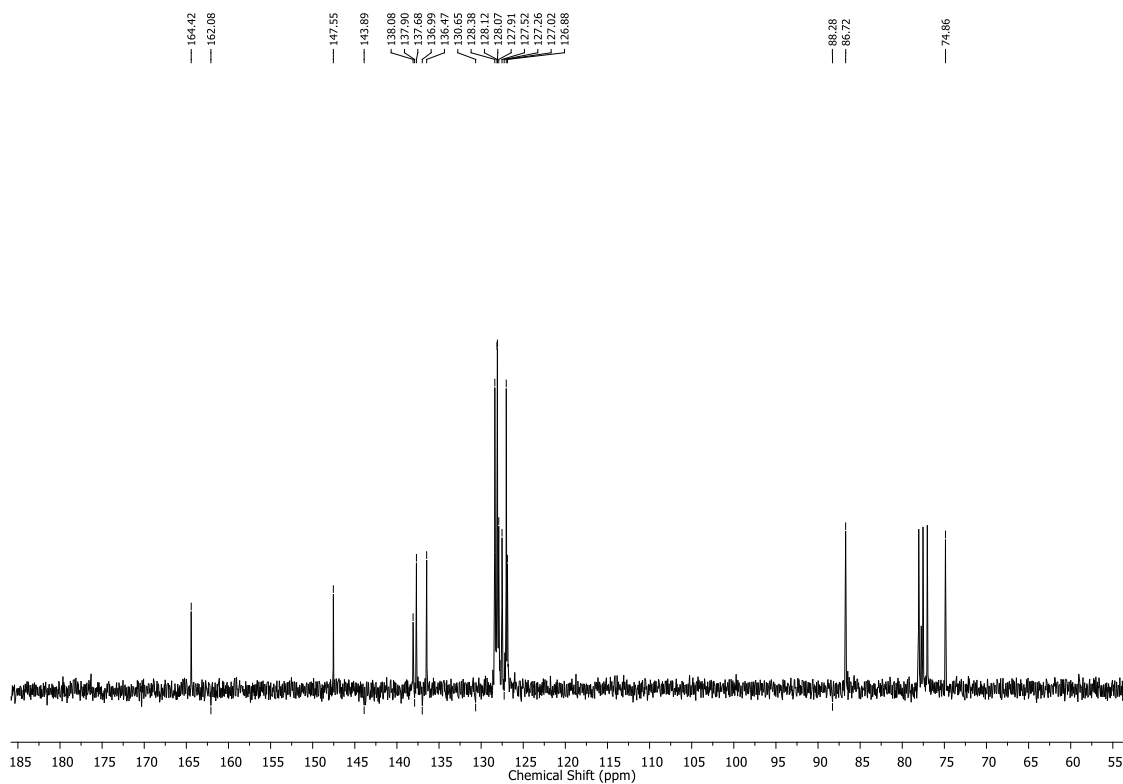

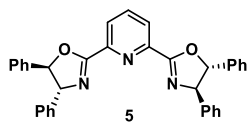

<sup>1</sup>H NMR (250 MHz, CDCl<sub>3</sub>)

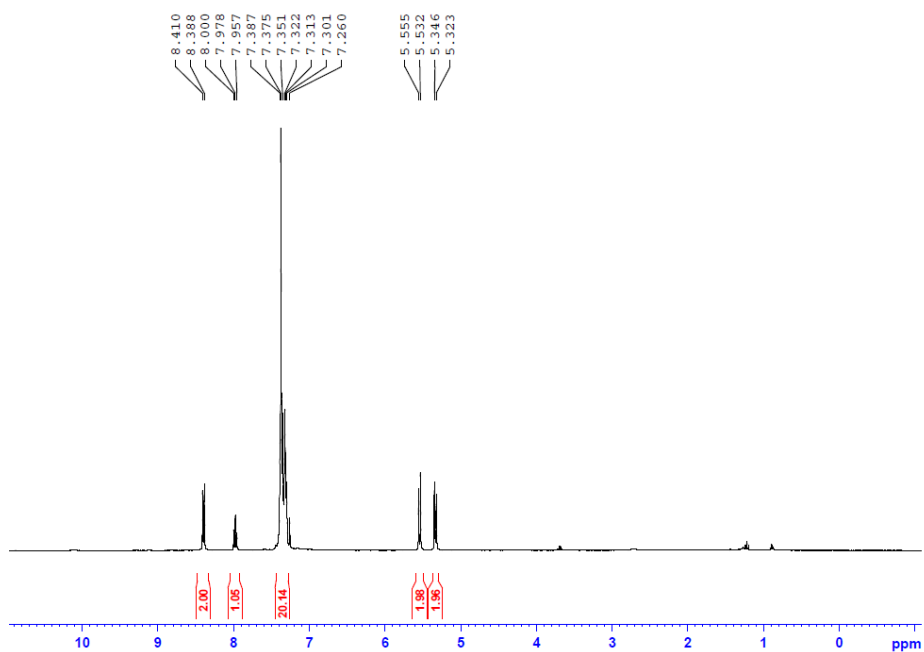

<sup>13</sup>C NMR (91 MHz, CDCl<sub>3</sub>)

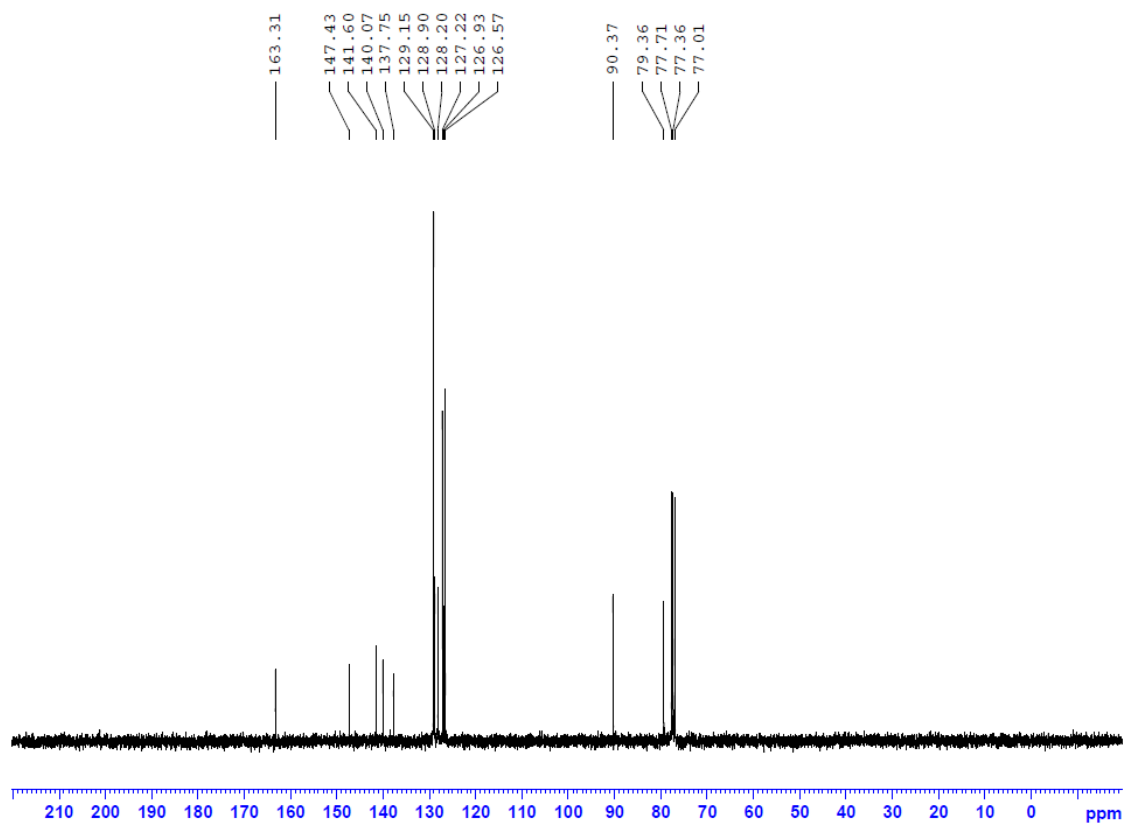

Supplement: molecules-24-01141-s001.pdf [file molecules-24-01141-s001.pdf]
